# Supplementary material
Source: PubMed Central journal article supplement (PMC7611832)
Supplement: EMS136340-supplement-Supplementary_Information.pdf [file EMS136340-supplement-Supplementary_Information.pdf]

## Supplementary Information

### Contents:

#### Supplementary Results

Non-additive effects

Menopause associated genes act across the life-course

#### Supplementary Figures

Supplementary Figure 1. Genome-wide significant signals showing departure from an additive model.

Supplementary Figure 2. Gene co-regulation networks for age at menopause genes with those co-regulated with MCM8 highlighted.

#### Supplementary References

#### Supplementary Notes

- 1) Acknowledgments and sources of funding for studies included in the genome-wide association analyses
- 2) Acknowledgments and sources of funding for studies included in Breast Cancer Association Consortium
- 3) Further acknowledgments and sources of funding
- 4) Individual study disclosures
- 5) Consortium membership

## Supplementary Results

### Non-additive effects

Given that additive models can identify variants that exhibit stronger dominant or recessive effects<sup>1</sup>, we tested all the identified signals for departure from an additive model. We identified three variants exhibiting non-additive effects (**Supplementary Table 3 and Supplementary Figure 1**). For a common variant in *PIWIL1* (rs28416520, MAF=46%,  $P=2\times 10^{-14}$ ) a recessive model was the best fit (**Supplementary Figure 1c**). Deletion of *Piwil1* in mice results in sterility in males, but not females, and its role in human oogenesis is uncertain. It is however expressed as a dense paranuclear granule in human primordial follicle oocytes<sup>2</sup>. A low-frequency missense variant in *HELB* (rs75770066, MAF=3%,  $P=7\times 10^{-16}$ ) appeared to exhibit a heterozygous advantage effect (**Supplementary Figure 1d**), with higher mean ANM in the heterozygous group (95% CI 51.37-51.58 years) than the common (50.24-50.30) and rare homozygote (48.58-50.16) groups. Further fine-mapping and experimental work will be required to understand the complex biological mechanism(s) at this locus.

### Menopause associated genes act across the life-course

Previous large-scale genetic analyses highlighted a clear involvement of homologous recombination and the *BRCA1-A* complex in the regulation of ovarian ageing. Our current study supports much broader DDR involvement, providing increased resolution of these pathways and informing when in the life-course they might act.

Our identified genes and pathway analyses strongly implicate repair pathways associated with replication stress, in particular removal of interstrand crosslinks, which covalently join both strands of the DNA helix, as well as DNA-protein crosslinks and R loops (DNA:RNA hybrids). All of these lesions stall DNA replication and prevent transcription (**Extended Data Fig. 5**). This observation is supported by recent work demonstrating the role of the interstrand crosslink pathway *in utero* for resolving DNA damage in pre-meiotic, primordial germ cells<sup>3</sup>. This process begins with replication fork remodelling at interstrand crosslinks by *FANCM*<sup>4-6</sup>, where we identify two independent ANM-associated missense variants (**Supplementary Table 4**). This subsequently leads to recruitment of the core Fanconi Anaemia (FA) complex to signal DNA damage, where we map missense variants in two of the eight genes – *FANCA* and *FANCB*. Furthermore we identify variants mapping key genes in the downstream repair systems coordinated by the FA pathway, including homologous recombination (e.g *RAD51*, *BRCA1*, *BRCA2*) as well as translesion synthesis (e.g *REV1*, *REV3L* and *RAD18*)<sup>7</sup>.

Several DDR genes highlighted by our study have critical meiotic functions in fetal oocytes where at least 500 programmed double-strand breaks (DSBs) initiate recombination<sup>8</sup>. We implicate key recombination and synaptonemal complex genes with functions in meiotic prophase (*STAG3*, *SMC16*, *EXO1*, *RAD51*, *DMC1*, *HELQ*, *RAD52*, *MSH5*). Mouse models of these genes show defective repair of meiotic recombination and subsequent apoptosis of fetal oocytes resulting in decreased primordial follicles from birth and infertility<sup>9-17</sup>. We note that several of our ANM-associated variants overlap those recently reported for recombination rate<sup>18</sup>, however, despite more nominally significant associations than expected by chance, there was no clear relationship between the direction of effect on menopause and recombination rate across the 290 ANM loci (**Supplementary Table 19**).

A range of factors likely contribute to the rate at which follicles are recruited and the follicular reserve depleted. Our data implicate key genes in the mTOR complex 1 (mTORC1) in ANM, including *STK11* and *DEPTOR*. The mTOR protein kinase that controls cell growth by regulating protein and

nucleotide synthesis and is activated by the PI3K pathway. Oocyte-specific deletion of *Pten* in mice removes the inhibiting effect of the PI3K pathway on primordial follicle activation, leading to premature recruitment and exhaustion of the entire primordial follicle pool<sup>19</sup>. Other ANM-implicated genes include *FSHB*, *NOBOX*, *INHBB*, *INHBC*, *LHCGR*, *IGF1*, *IGFBP1*, *PPARG* and *BMP1B*, highlighting broader endocrine and metabolic mechanisms governing ANM. We also identified common variants in *FTO* associated with ANM (**Supplementary Table 2**) which are distinct from the well-established body weight association in this region ( $r^2$  with lead BMI variant rs1558902 = 0.0002).

Finally, the majority of known genes causing POI implicate aberrant DNA damage or the inability to repair it, with limited evidence in humans that defects in the downstream cell-death signaling pathways impact variation in reproductive ageing. In contrast, our study identifies more than 58 genes implicated in regulation of apoptosis associated with ANM (**Supplementary Table 20**), providing evidence that variation in cell death following DDR is an important mechanism. This includes components and interactors of the central, conserved DDR checkpoint kinases ATR-CHEK1 (single stranded DNA) and ATM-CHEK2 (double strand breaks), that integrate and determine repair and cellular response from a broad variety of DNA repair pathways (**Extended Data Fig. 5**).

Whilst the breadth of DDR pathways identified suggests our identified loci may exert their effect at different stages across the life-course, we sought to evaluate this by assessing patterns of germ cell gene expression across different developmental stages. The individual expression profiles of our 283 consensus genes (**Supplementary Table 2**) were assessed in human fetal primordial germ cells from 5 to 26 weeks gestation, in addition to oocyte and granulosa expression in adult follicles at different stages of growth (**Extended Data Fig. 6 and Supplementary Table 21**). Collectively these data identified distinct clusters of genes that were active at different stages of life and follicle growth. The majority of our identified genes appeared most active in fetal primordial germ cells and fetal oocytes, however distinct expression profiles were evident across all developmental stages and between oocytes and granulosa cells (**Extended Data Fig. 6**). In many cases the pattern of expression was consistent with the known biological roles of those genes, for example Fanconi anemia genes were predominantly expressed in the fetal germ cells as well as the oocytes of the growing follicles, with less pronounced expression in granulosa cells (**Supplementary Table 21**). In contrast, genes such as *POLG* and *TP63* were predominantly expressed during follicular stages, consistent with apoptotic inducing activity in response to DNA damage observed in growing oocytes in mouse<sup>20-23</sup>. Further studies will be required to build on our observations and confirm the mechanism underlying the genetic associations.

## Supplementary Figures

**Supplementary Figure 1. Genome-wide significant signals showing departure from an additive model.** We tested the identified signals for departure from an additive allelic model. **a**, rs11668344 shows no deviation from an additive allelic model; **b**, rs11670032 and **c**, rs28416520 show deviation from the additive allelic model and a recessive effect; and **d**, rs75770066 shows a heterozygote effect. The mean and 95% confidence interval around the mean estimate are shown for each genotype. The expected mean ANM for the heterozygotes is the average of the mean ANM in the homozygote groups. The dashed orange line shows the effect estimate by genotype from linear regression based on an additive allelic model. Estimated ANM for each genotype was calculated as constant from regression model + number alleles  $\times$  effect estimate from regression model. The dashed grey line indicates the additive effect estimate by genotype from a model adjusting for the dominance deviation effect of the heterozygote group (solid grey line). All regression models were adjusted for centre, genotyping chip and genetic principal components. ANM, age at natural menopause; dom dev, dominance deviation.

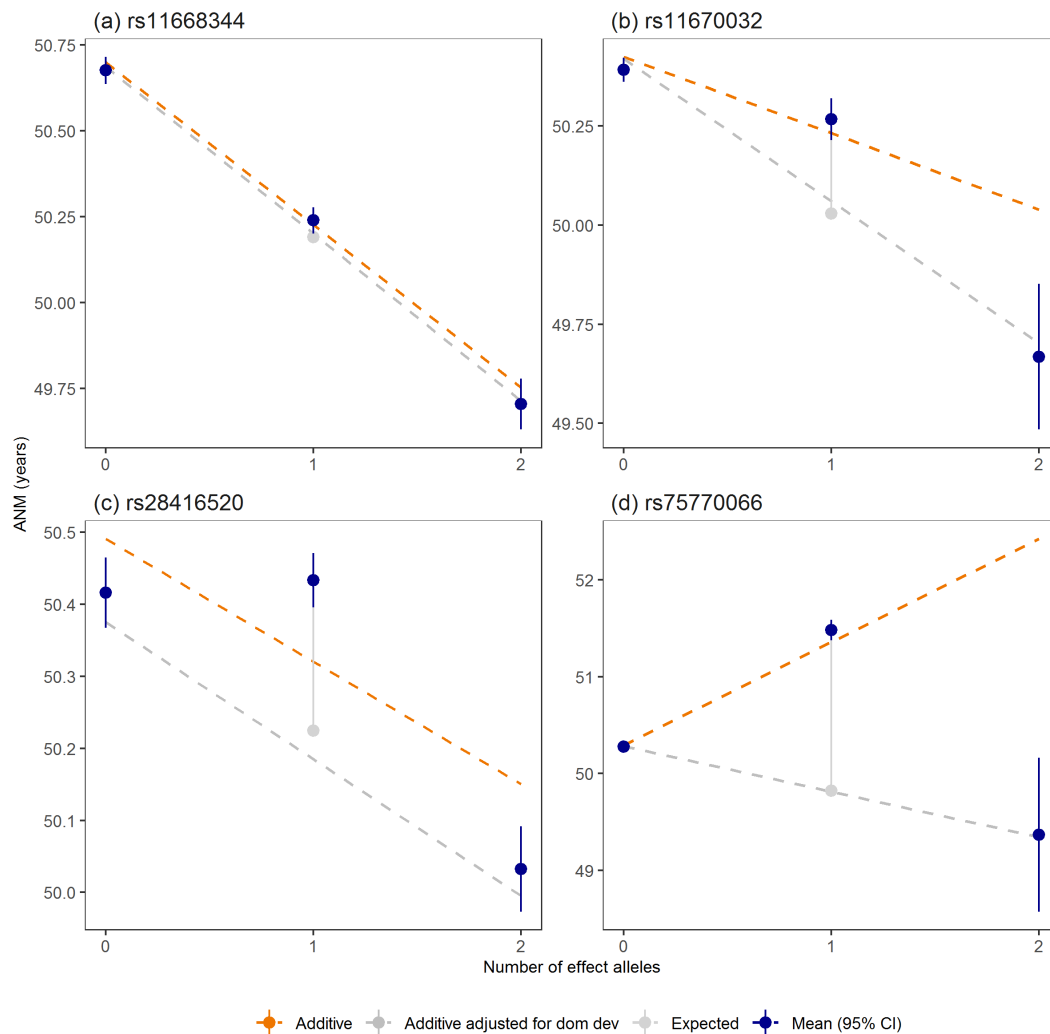

**Supplementary Figure 2. Gene co-regulation networks for age at menopause genes with those co-regulated with *MCM8* highlighted.**

**a**, Gene co-regulation network for genes relating to age at menopause. Nodes indicate genes that either in a *cis* region from the GWAS or have been prioritized by Downstreamer, edges indicate a co-regulation relationship with a Z-score >4. Co-regulation is defined as the Pearson correlation between genes in a scaled eigenvector matrix derived from a multi-tissue gene network [Deelen et al, Nat. Commun. 2019]. *Cis* genes are defined as genes that are within +/-300kb of a GWAS top hit for age at menopause. *Trans* genes are defined as having been prioritized by Downstreamer's co-regulation analysis and are not within +/-300kb of a GWAS top hit. Downstreamer prioritizes genes by associating the gene p-value profile of the GWAS (calculated using PASCAL [Lamparter et al, PLOS Comput. Biol. 2016]) to the co-regulation profile of each protein coding gene. Only genes where this association passes Bonferroni significance are shown as trans genes. Colours of nodes indicate the following: Teal indicates *Cis* genes, Dark Teal indicates *Trans* genes and Yellow indicates genes with a 1st degree relation to *MCM8*. **b**, Gene co-regulation network showing the genes that have a first degree relationship with *MCM8* with a Z-score >4. Width of the edge indicates the Z-score of the co-regulation relationship. Colours indicate the same as in **a**, with the exception of Yellow, as all genes indicated have a 1st degree relation to *MCM8*.

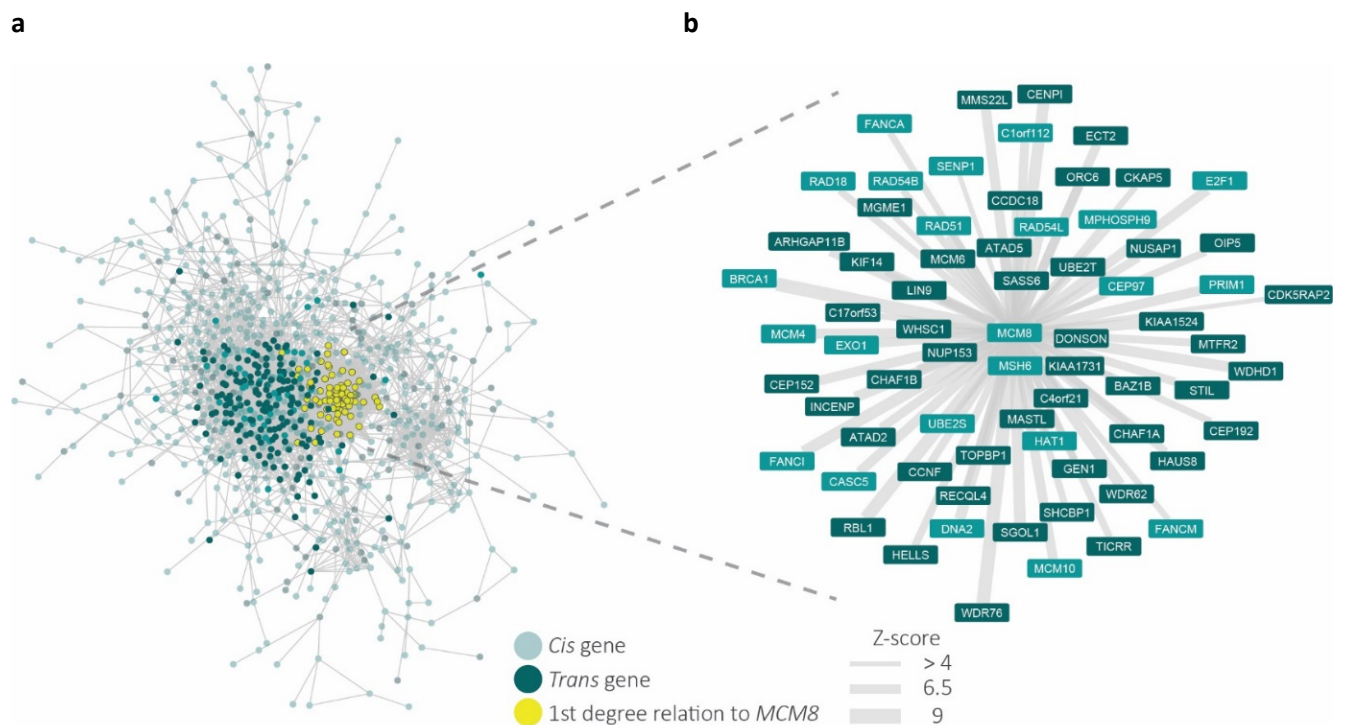

## Supplementary References

1. Wood, A. R. *et al.* Variants in the FTO and CDKAL1 loci have recessive effects on risk of obesity and type 2 diabetes, respectively. *Diabetologia* **59**, 1214–21 (2016).
2. Gomes Fernandes, M. *et al.* Human-specific subcellular compartmentalization of P-element induced wimpy testis-like (PIWIL) granules during germ cell development and spermatogenesis. *Hum. Reprod.* **33**, 258–269 (2018).
3. Hill, R. J. & Crossan, G. P. DNA cross-link repair safeguards genomic stability during premeiotic germ cell development. *Nat. Genet.* **51**, 1283–1294 (2019).
4. Meetei, A. R. *et al.* A human ortholog of archaeal DNA repair protein Hef is defective in Fanconi anemia complementation group M. *Nat. Genet.* **37**, 958–63 (2005).
5. Gari, K., Décaillot, C., Stasiak, A. Z., Stasiak, A. & Constantinou, A. The Fanconi anemia protein FANCM can promote branch migration of Holliday junctions and replication forks. *Mol. Cell* **29**, 141–8 (2008).
6. Gari, K., Décaillot, C., Delannoy, M., Wu, L. & Constantinou, A. Remodeling of DNA replication structures by the branch point translocase FANCM. *Proc. Natl. Acad. Sci. U. S. A.* **105**, 16107–12 (2008).
7. Sale, J. E., Lehmann, A. R. & Woodgate, R. Y-family DNA polymerases and their role in tolerance of cellular DNA damage. *Nat. Rev. Mol. Cell Biol.* **13**, 141–52 (2012).
8. Lenzi, M. L. *et al.* Extreme heterogeneity in the molecular events leading to the establishment of chiasmata during meiosis I in human oocytes. *Am. J. Hum. Genet.* **76**, 112–27 (2005).
9. Caburet, S. *et al.* Mutant cohesin in premature ovarian failure. *N. Engl. J. Med.* **370**, 943–949 (2014).
10. Titus, S. *et al.* Impairment of BRCA1-related DNA double-strand break repair leads to ovarian aging in mice and humans. *Sci. Transl. Med.* **5**, 172ra21 (2013).
11. Wei, K. *et al.* Inactivation of Exonuclease 1 in mice results in DNA mismatch repair defects, increased cancer susceptibility, and male and female sterility. *Genes Dev.* **17**, 603–14 (2003).
12. Abreu, C. M. *et al.* Shu complex SWS1-SWSAP1 promotes early steps in mouse meiotic recombination. *Nat. Commun.* **9**, 3961 (2018).
13. Yoshida, K. *et al.* The mouse RecA-like gene Dmc1 is required for homologous chromosome synapsis during meiosis. *Mol. Cell* **1**, 707–18 (1998).
14. Pittman, D. L. *et al.* Meiotic prophase arrest with failure of chromosome synapsis in mice deficient for Dmc1, a germline-specific RecA homolog. *Mol. Cell* **1**, 697–705 (1998).
15. Ward, J. D. *et al.* Overlapping mechanisms promote postsynaptic RAD-51 filament disassembly during meiotic double-strand break repair. *Mol. Cell* **37**, 259–72 (2010).
16. Revenkova, E. *et al.* Cohesin SMC1 beta is required for meiotic chromosome dynamics, sister chromatid cohesion and DNA recombination. *Nat. Cell Biol.* **6**, 555–62 (2004).
17. de Vries, S. S. *et al.* Mouse Mts-like protein Msh5 is required for proper chromosome synapsis in male and female meiosis. *Genes Dev.* **13**, 523–31 (1999).
18. Halldorsson, B. V. *et al.* Characterizing mutagenic effects of recombination through a sequence-level genetic map. *Science* **363**, (2019).

19. Reddy, P. *et al.* Oocyte-specific deletion of Pten causes premature activation of the primordial follicle pool. *Science* **319**, 611–3 (2008).
20. Suh, E.-K. *et al.* p63 protects the female germ line during meiotic arrest. *Nature* **444**, 624–8 (2006).
21. Deutsch, G. B. *et al.* DNA damage in oocytes induces a switch of the quality control factor TAp63 $\alpha$  from dimer to tetramer. *Cell* **144**, 566–76 (2011).
22. Tuppi, M. *et al.* Oocyte DNA damage quality control requires consecutive interplay of CHK2 and CK1 to activate p63. *Nat. Struct. Mol. Biol.* **25**, 261–269 (2018).
23. Rinaldi, V. D., Bloom, J. C. & Schimenti, J. C. Oocyte Elimination Through DNA Damage Signaling from CHK1/CHK2 to p53 and p63. *Genetics* **215**, 373–378 (2020).

## Supplementary Notes

### 1) Acknowledgments and sources of funding for studies included in the genome-wide association analyses

| Study acronym | Full study name                                      | Acknowledgments and sources of funding                                                                                                                                                                                                                                                                                                                                                                                                                                                                                                                                                                                                                                                                                                                                                                                                                                                                                                                                                                                                                                                                                                                                                                                                             |
|---------------|------------------------------------------------------|----------------------------------------------------------------------------------------------------------------------------------------------------------------------------------------------------------------------------------------------------------------------------------------------------------------------------------------------------------------------------------------------------------------------------------------------------------------------------------------------------------------------------------------------------------------------------------------------------------------------------------------------------------------------------------------------------------------------------------------------------------------------------------------------------------------------------------------------------------------------------------------------------------------------------------------------------------------------------------------------------------------------------------------------------------------------------------------------------------------------------------------------------------------------------------------------------------------------------------------------------|
| 23andMe       | 23andMe                                              | <p>We would like to thank the research participants and employees of 23andMe for making this work possible.</p> <p>The following members of the 23andMe Research Team contributed to this study:</p> <p>Michelle Agee, Stella Aslibekyan, Adam Auton, Elizabeth Babalola, Robert K. Bell, Jessica Bielenberg, Katarzyna Bryc, Emily Bullis, Briana Cameron, Daniella Coker, Gabriel Cuellar Partida, Devika Dhamija, Sayantan Das, Sarah L. Elson, Teresa Filshstein, Kipper Fletez-Brant, Will Freyman, Pooja M. Gandhi, Karl Heilbron, Barry Hicks, David A. Hinds, Karen E. Huber, Ethan M. Jewett, Yunxuan Jiang, Aaron Kleinman, Katelyn Kukar, Vanessa Lane, Keng-Han Lin, Maya Lowe, Marie K. Luff, Jennifer C. McCreight, Matthew H. McIntyre, Kimberly F. McManus, Steven J. Micheletti, Meghan E. Moreno, Joanna L. Mountain, Sahar V. Mozaffari, Priyanka Nandakumar, Elizabeth S. Noblin, Jared O'Connell, Aaron A. Petrakovitz, G. David Poznik, Morgan Schumacher, Anjali J. Shastri, Janie F. Shelton, Jingchunzi Shi, Suyash Shringarpure, Chao Tian, Vinh Tran, Joyce Y. Tung, Xin Wang, Wei Wang, Catherine H. Weldon, Peter Wilton</p>                                                                                          |
| AGES          | Age, Gene/Environment Susceptibility-Reykjavik Study | <p>This study has been funded by NIH contracts N01-AG-1-2100 and 271201200022C, the NIA Intramural Research Program, Hjartavernd (the Icelandic Heart Association), and the Althingi (the Icelandic Parliament). The study is approved by the Icelandic National Bioethics Committee, VSN: 00-063. The researchers are indebted to the participants for their willingness to participate in the study.</p>                                                                                                                                                                                                                                                                                                                                                                                                                                                                                                                                                                                                                                                                                                                                                                                                                                         |
| ALSPAC        | Avon Longitudinal Study of Parents and Children      | <p>We are extremely grateful to all the families who took part in this study, the midwives for their help in recruiting them, and the whole ALSPAC team, which includes interviewers, computer and laboratory technicians, clerical workers, research scientists, volunteers, managers, receptionists and nurses.</p> <p>The UK Medical Research Council and the Wellcome Trust (Grant ref: 217065/Z/19/Z) and the University of Bristol provide core support for ALSPAC. GWAS data for ALSPAC mothers was funded by the Wellcome Trust (WT088806) and phenotype data by the British Heart Foundation (SP/07/008/24066), Wellcome Trust (WT092830M) and MRC (G1001357). GWAS data for ALSPAC offspring was generated by Sample Logistics and Genotyping Facilities at the Wellcome Trust Sanger Institute and LabCorp (Laboratory Corporation of America) using support from 23andMe. DAL, NJT, SMR and GDS work in a Unit that receives support from the University of Bristol and MRC (MC_UU_00011/1 and MC_UU_00011/6).</p>                                                                                                                                                                                                                     |
| ARIC          | Atherosclerosis Risk in Communities Study            | <p>The Atherosclerosis Risk in Communities study has been funded in whole or in part with Federal funds from the National Heart, Lung, and Blood Institute, National Institutes of Health, Department of Health and Human Services, under Contract nos. (HHSN268201700001I, HHSN268201700002I, HHSN268201700003I, HHSN268201700005I, HHSN268201700004I).</p> <p>The authors thank the staff and participants of the ARIC study for their important contributions.</p> <p>The Atherosclerosis Risk in Communities study has been funded in whole or in part with Federal funds from the National Heart, Lung, and Blood Institute, National Institutes of Health, Department of Health and Human Services (contract numbers HHSN268201700001I, HHSN268201700002I, HHSN268201700003I, HHSN268201700004I and HHSN268201700005I), R01HL087641, R01HL086694; National Human Genome Research Institute contract U01HG004402; and National Institutes of Health contract HHSN268200625226C. The authors thank the staff and participants of the ARIC study for their important contributions. Infrastructure was partly supported by Grant Number UL1RR025005, a component of the National Institutes of Health and NIH Roadmap for Medical Research.</p> |



|                     |                                             |                                                                                                                                                                                                                                                                                                                                                                                                                                                                                                                                                                                                                                                                                                                                                                                                                                                                                                                                                                                                                                                                                                                           |
|---------------------|---------------------------------------------|---------------------------------------------------------------------------------------------------------------------------------------------------------------------------------------------------------------------------------------------------------------------------------------------------------------------------------------------------------------------------------------------------------------------------------------------------------------------------------------------------------------------------------------------------------------------------------------------------------------------------------------------------------------------------------------------------------------------------------------------------------------------------------------------------------------------------------------------------------------------------------------------------------------------------------------------------------------------------------------------------------------------------------------------------------------------------------------------------------------------------|
| BCAC/ iCOGs         | Breast Cancer Association Consortium/ iCOGs | See separate section below for details of individual studies.                                                                                                                                                                                                                                                                                                                                                                                                                                                                                                                                                                                                                                                                                                                                                                                                                                                                                                                                                                                                                                                             |
| CARL                | INGI-CARLANTINO                             | We would like to thank all the participants in the study for their contribution and support<br><br>The study was supported through the Italian Ministry of Health                                                                                                                                                                                                                                                                                                                                                                                                                                                                                                                                                                                                                                                                                                                                                                                                                                                                                                                                                         |
| CHS                 | Cardiovascular Health Study                 | This CHS research was supported by NHLBI contracts HHSN268201200036C, HHSN268200800007C, HHSN268201800001C, N01HC55222, N01HC85079, N01HC85080, N01HC85081, N01HC85082, N01HC85083, N01HC85086; and NHLBI grants U01HL080295, R01HL087652, R01HL105756, R01HL103612, R01HL120393, U01HL130114 and 75N92021D00006 with additional contribution from the National Institute of Neurological Disorders and Stroke (NINDS). Additional support was provided through R01AG023629 from the National Institute on Aging (NIA). A full list of principal CHS investigators and institutions can be found at CHS-NHLBI.org.<br><br>The provision of genotyping data was supported in part by the National Center for Advancing Translational Sciences, CTSI grant UL1TR001881, and the National Institute of Diabetes and Digestive and Kidney Disease Diabetes Research Center (DRC) grant DK063491 to the Southern California Diabetes Endocrinology Research Center.<br><br>The content is solely the responsibility of the authors and does not necessarily represent the official views of the National Institutes of Health. |
| CILENTO             | CILENTO                                     | We thank the populations of Cilento for their participation in the study.<br><br>This work was supported by grants from the Italian Ministry of Universities (FIRB-RBNE08NKH7, INTEROMICS Flagship Project), the Assessoreto Ricerca Regione Campania, the Fondazione con il SUD (2011-PDR-13) and the Istituto Banco di Napoli - Fondazione to MC.                                                                                                                                                                                                                                                                                                                                                                                                                                                                                                                                                                                                                                                                                                                                                                       |
| COLAUS              | CoLaus (Etude Cohorte Lausannoise)          | The CoLaus study was and is supported by research grants from GlaxoSmithKline, the Faculty of Biology and Medicine of Lausanne, and the Swiss National Science Foundation (grants 33CSO-122661, 33CS30-139468, 33CS30-148401 and 33CS30_177535/1).                                                                                                                                                                                                                                                                                                                                                                                                                                                                                                                                                                                                                                                                                                                                                                                                                                                                        |
| CROATIA Korcula     | CROATIA Korcula                             | We would like to acknowledge the contributions of the recruitment team in Korcula, the administrative teams in Croatia and Edinburgh and the people of Korcula. The SNP genotyping for the KORCULA cohort was performed in Helmholtz Zentrum München, Neuherberg, Germany.<br><br>Medical Research Council UK and the Ministry of Science, Education and Sport in the Republic of Croatia (number 108-1080315-0302).                                                                                                                                                                                                                                                                                                                                                                                                                                                                                                                                                                                                                                                                                                      |
| CROATIA Vis         | CROATIA Vis                                 | We would like to acknowledge the staff of several institutions in Croatia that supported the field work, including but not limited to The University of Split and Zagreb Medical Schools, Institute for Anthropological Research in Zagreb and Croatian Institute for Public Health.<br><br>Medical Research Council UK and the Ministry of Science, Education and Sport in the Republic of Croatia (number 108-1080315-0302).                                                                                                                                                                                                                                                                                                                                                                                                                                                                                                                                                                                                                                                                                            |
| EGCUT-370 and OmniX | Estonian Genome Center, University of Tartu | This study was supported by EU H2020 grants 692145, 676550, 654248, Estonian Research Council Grant IUT20-60, NIASC, and EU through the European Regional Development Fund (Project No. 2014-2020.4.01.15-0012 GENTRANSMED).                                                                                                                                                                                                                                                                                                                                                                                                                                                                                                                                                                                                                                                                                                                                                                                                                                                                                              |
| EPIC-Norfolk        | The EPIC-Norfolk Study                      | The EPIC-Norfolk study (DOI 10.22025/2019.10.105.00004) has received funding from the Medical Research Council (MR/N003284/1 MC-UU_12015/1 and MC_UU_00006/1) and Cancer Research UK (C864/A14136). The genetics work in the EPIC-Norfolk study was funded by the Medical Research Council (MC_PC_13048). We are grateful to all the participants who have been part of the project and to the many members of the study teams at the University of                                                                                                                                                                                                                                                                                                                                                                                                                                                                                                                                                                                                                                                                       |

|            |                                                   |                                                                                                                                                                                                                                                                                                                                                                                                                                                                                                                                                                                                                                                                                                                                                                                                                                                                                                                                                                                                                                                                                                                                                                                                                                                                                                                                                                                                                                                                      |
|------------|---------------------------------------------------|----------------------------------------------------------------------------------------------------------------------------------------------------------------------------------------------------------------------------------------------------------------------------------------------------------------------------------------------------------------------------------------------------------------------------------------------------------------------------------------------------------------------------------------------------------------------------------------------------------------------------------------------------------------------------------------------------------------------------------------------------------------------------------------------------------------------------------------------------------------------------------------------------------------------------------------------------------------------------------------------------------------------------------------------------------------------------------------------------------------------------------------------------------------------------------------------------------------------------------------------------------------------------------------------------------------------------------------------------------------------------------------------------------------------------------------------------------------------|
|            |                                                   | Cambridge who have enabled this research.                                                                                                                                                                                                                                                                                                                                                                                                                                                                                                                                                                                                                                                                                                                                                                                                                                                                                                                                                                                                                                                                                                                                                                                                                                                                                                                                                                                                                            |
| FHS        | Framingham Heart Study                            | <p>The authors thank the Framingham Heart Study participants and staff.</p> <p>The Framingham Heart Study phenotype-genotype analyses were supported by NIA R01AG29451 JMM, KLL). The Framingham Heart Study of the National Heart Lung and Blood Institute of the National Institutes of Health and Boston University School of Medicine was supported by the National Heart, Lung and Blood Institute's Framingham Heart Study Contract No. N01-HC-25195 and its contract with Affymetrix, Inc for genotyping services (Contract No. N02-HL-6-4278). Analyses reflect intellectual input and resource development from the Framingham Heart Study investigators participating in the SNP Health Association Resource (SHARe) project. A portion of this research was conducted using the Linux Cluster for Genetic Analysis (LinGA-II) funded by the Robert Dawson Evans Endowment of the Department of Medicine at Boston University School of Medicine and Boston Medical Center.</p> <p>Framingham Heart Study Contract No. N01-HC-25195, HHSN268201500001</p> <p>The authors are pleased to acknowledge that the computational work reported on in this paper was performed on the Shared Computing Cluster which is administered by Boston University's Research Computing Services. URL: <a href="http://www.bu.edu/tech/support/research/">www.bu.edu/tech/support/research/</a>. The authors thank the participants for their dedication to the study.</p> |
| FVG        | INGI- FRIULI VENEZIA GIULIA                       | <p>We would like to thank all the participants in the study for their contribution and support</p> <p>The study was supported by Regione FVG (L.26.2008) and Italian Ministry of Health</p>                                                                                                                                                                                                                                                                                                                                                                                                                                                                                                                                                                                                                                                                                                                                                                                                                                                                                                                                                                                                                                                                                                                                                                                                                                                                          |
| GS         | Generation Scotland: Scottish Family Health Study | <p>We are grateful to all the families who took part, the general practitioners and the Scottish School of Primary Care for their help in recruiting them, and the whole Generation Scotland team, which includes interviewers, computer and laboratory technicians, clerical workers, research scientists, volunteers, managers, receptionists, healthcare assistants and nurses.</p> <p>Generation Scotland received core support from the Chief Scientist Office of the Scottish Government Health Directorates [CZD/16/6] and the Scottish Funding Council [HR03006] and is currently supported by the Wellcome Trust [216767/Z/19/Z]. Genotyping of the GS:SFHS samples was carried out by the Genetics Core Laboratory at the Edinburgh Clinical Research Facility, University of Edinburgh, Scotland and was funded by the Medical Research Council UK and the Wellcome Trust (Wellcome Trust Strategic Award "Stratifying Resilience and Depression Longitudinally" (STRADL) Reference 104036/Z/14/Z).</p>                                                                                                                                                                                                                                                                                                                                                                                                                                                   |
| HANDLS     |                                                   |                                                                                                                                                                                                                                                                                                                                                                                                                                                                                                                                                                                                                                                                                                                                                                                                                                                                                                                                                                                                                                                                                                                                                                                                                                                                                                                                                                                                                                                                      |
| Health ABC | The Health, Aging, and Body Composition Study     | <p>This study utilized the high-performance computational capabilities of the Biowulf Linux cluster at the National Institutes of Health, Bethesda, Md. (<a href="http://biowulf.nih.gov">http://biowulf.nih.gov</a>).</p> <p>The Health ABC Study was supported by NIA contracts N01AG62101, N01AG62103, and N01AG62106 and, in part, by the NIA Intramural Research Program. The genome-wide association study was funded by NIA grant 1R01AG032098-01A1 to Wake Forest University Health Sciences and genotyping services were provided by the Center for Inherited Disease Research (CIDR). CIDR is fully funded through a federal contract from the National Institutes of Health to The Johns Hopkins University, contract number HHSN268200782096C.</p>                                                                                                                                                                                                                                                                                                                                                                                                                                                                                                                                                                                                                                                                                                       |

|                           |                                                                                                   |                                                                                                                                                                                                                                                                                                                                                                                                                                                                                                                                                                                                                                                                                                                                                                                                                                                                                                                                                                                                                                                                                                                                                                                                                                                                                                                                                                                                                                                                                                                                                                                                                                                                                                                                                                                 |
|---------------------------|---------------------------------------------------------------------------------------------------|---------------------------------------------------------------------------------------------------------------------------------------------------------------------------------------------------------------------------------------------------------------------------------------------------------------------------------------------------------------------------------------------------------------------------------------------------------------------------------------------------------------------------------------------------------------------------------------------------------------------------------------------------------------------------------------------------------------------------------------------------------------------------------------------------------------------------------------------------------------------------------------------------------------------------------------------------------------------------------------------------------------------------------------------------------------------------------------------------------------------------------------------------------------------------------------------------------------------------------------------------------------------------------------------------------------------------------------------------------------------------------------------------------------------------------------------------------------------------------------------------------------------------------------------------------------------------------------------------------------------------------------------------------------------------------------------------------------------------------------------------------------------------------|
| HRS                       | Health and Retirement Study                                                                       | HRS is supported by the National Institute on Aging (NIA U01AG009740). The genotyping was funded separately by the National Institute on Aging (RC2 AG036495, RC4 AG039029). Our genotyping was conducted by the NIH Center for Inherited Disease Research (CIDR) at Johns Hopkins University. Genotyping quality control and final preparation of the data were performed by the Genetics Coordinating Center at the University of Washington.                                                                                                                                                                                                                                                                                                                                                                                                                                                                                                                                                                                                                                                                                                                                                                                                                                                                                                                                                                                                                                                                                                                                                                                                                                                                                                                                 |
| INCHIANTI                 | Invecchiare in Chianti                                                                            | The InCHIANTI study baseline (1998-2000) was supported as a "targeted project" (ICS110.1/RF97.71) by the Italian Ministry of Health and in part by the U.S. National Institute on Aging (Contracts: 263 MD 9164 and 263 MD 821336).                                                                                                                                                                                                                                                                                                                                                                                                                                                                                                                                                                                                                                                                                                                                                                                                                                                                                                                                                                                                                                                                                                                                                                                                                                                                                                                                                                                                                                                                                                                                             |
| InterAct cases and cohort | European Prospective Investigation into Cancer & Nutrition - InterAct                             | We thank all EPIC participants and staff and the InterAct Consortium members for their contributions to the study. The InterAct project received funding from the European Union (Integrated Project LSHM-CT-2006-037197 in the Framework Programme 6 of the European Community). We thank staff from the technical, field epidemiology and data teams of the Medical Research Council Epidemiology Unit in Cambridge, UK, for carrying out sample preparation, DNA provision and quality control, genotyping and data handling work.                                                                                                                                                                                                                                                                                                                                                                                                                                                                                                                                                                                                                                                                                                                                                                                                                                                                                                                                                                                                                                                                                                                                                                                                                                           |
| KORA F3 / KORA F4         | KORA F3 and F4: Cooperative Health Research in the Augsburg Region, Follow up for Study S3 and S4 | The KORA study was initiated and financed by the Helmholtz Zentrum München – German Research Center for Environmental Health, which is funded by the German Federal Ministry of Education and Research (BMBF) and by the State of Bavaria. The KORA-Study Group consists of A. Peters (speaker), H. Schulz, R. Holle, R. Leidl, C. Meisinger, K. Strauch, and their co-workers, who are responsible for the design and conduct of the KORA studies. Furthermore, KORA research was supported within the Munich Center of Health Sciences (MC-Health), Ludwig-Maximilians-Universität, as part of LMUinnovativ. The funders had no role in study design, data collection and analysis, decision to publish, or preparation of the manuscript. We thank all study participants and the study staff.                                                                                                                                                                                                                                                                                                                                                                                                                                                                                                                                                                                                                                                                                                                                                                                                                                                                                                                                                                               |
| LifeLines                 | The LifeLines Cohort Study                                                                        | <p>The authors wish to acknowledge Behrooz Z. Alizadeh, Annemieke Boesjes, Marcel Bruinenberg, Noortje Festen, Pim van der Harst, Ilja Nolte, Lude Franke, Mitra Valimohammadi for their help in creating the GWAS database, and Rob Bieringa, Joost Keers, René Oostergo, Rosalie Visser, Judith Vonk for their work related to data-collection and validation. The authors are grateful to the study participants, the staff from the LifeLines Cohort Study and the contributing research centers delivering data to LifeLines and the participating general practitioners and pharmacists.</p> <p>The Lifelines Biobank initiative has been made possible by subsidy from the Dutch Ministry of Health, Welfare and Sport, the Dutch Ministry of Economic Affairs, the University Medical Center Groningen (UMCG the Netherlands), University Groningen and the Northern Provinces of the Netherlands.</p> <p>The Lifelines Cohort Study was supported by the Netherlands Organization for Scientific Research (NWO) [grant 175.010.2007.006]; the Economic Structure Enhancing Fund (FES) of the Dutch government; the Ministry of Economic Affairs; the Ministry of Education, Culture and Science; the Ministry for Health, Welfare and Sports; the Northern Netherlands Collaboration of Provinces (SNN); the Province of Groningen; University Medical Center Groningen; the University of Groningen; the Dutch Kidney Foundation; and the Dutch Diabetes Research Foundation. The Lifelines Cohort Study is supported by the National Consortium for Healthy Ageing and the BioSHaRE-EU consortium (KP7, project reference 261433). The funders had no role in study design, data collection and analysis, decision to publish, or preparation of the manuscript.</p> |

|                                                               |                                           |                                                                                                                                                                                                                                                                                                                                                                                                                                                                                                                                                                                                                                                                                                                                                                                                                                                                                                                                                                                                                                                                                                                                                                                                                                                                                                                                                                                                                                                                                                                                                                                                                                                                                                                                                                                                                                                                                                                                                                                                                                                                                                                                                           |
|---------------------------------------------------------------|-------------------------------------------|-----------------------------------------------------------------------------------------------------------------------------------------------------------------------------------------------------------------------------------------------------------------------------------------------------------------------------------------------------------------------------------------------------------------------------------------------------------------------------------------------------------------------------------------------------------------------------------------------------------------------------------------------------------------------------------------------------------------------------------------------------------------------------------------------------------------------------------------------------------------------------------------------------------------------------------------------------------------------------------------------------------------------------------------------------------------------------------------------------------------------------------------------------------------------------------------------------------------------------------------------------------------------------------------------------------------------------------------------------------------------------------------------------------------------------------------------------------------------------------------------------------------------------------------------------------------------------------------------------------------------------------------------------------------------------------------------------------------------------------------------------------------------------------------------------------------------------------------------------------------------------------------------------------------------------------------------------------------------------------------------------------------------------------------------------------------------------------------------------------------------------------------------------------|
| NEO                                                           | Netherlands<br>Epidemiology of<br>Obesity | <p>The authors of the NEO study thank all individuals who participated in the Netherlands Epidemiology in Obesity study, all participating general practitioners for inviting eligible participants and all research nurses for collection of the data. We thank the NEO study group, Pat van Beelen, Petra Noordijk and Ingeborg de Jonge for the coordination, lab and data management of the NEO study.</p> <p>The genotyping in the NEO study was supported by the Centre National de Génotypage (Paris, France), headed by Jean-Francois Deleuze. The NEO study is supported by the participating Departments, the Division and the Board of Directors of the Leiden University Medical Center, and by the Leiden University, Research Profile Area Vascular and Regenerative Medicine. Dennis Mook-Kanamori is supported by Dutch Science Organization (ZonMW-VENI Grant 916.14.023).</p>                                                                                                                                                                                                                                                                                                                                                                                                                                                                                                                                                                                                                                                                                                                                                                                                                                                                                                                                                                                                                                                                                                                                                                                                                                                           |
| NHS<br>Affymetrix /<br>NHS Illumina /<br>NHS Omni-<br>Express | The Nurses' Health<br>Study (NHS)         | <p>The NHS GWAS were supported by grants from the National Institutes of Health [NCI (CA40356, CA087969, CA055075, CA98233, U01 CA137088, R01 CA059045, R01 CA137178, R01 CA082838, R01 CA131332), NIDDK (DK058845, DK070756), NHGRI (HG004399, HG004728), NHLBI (HL35464), NIAMS (R01 AR056291)]. We would like to thank the participants and staff of the NHS and NHSII for their valuable contributions as well as the following state cancer registries for their help: AL, AZ, AR, CA, CO, CT, DE, FL, GA, ID, IL, IN, IA, KY, LA, ME, MD, MA, MI, NE, NH, NJ, NY, NC, ND, OH, OK, OR, PA, RI, SC, TN, TX, VA, WA, WY. The authors assume full responsibility for analyses and interpretation of these data.</p>                                                                                                                                                                                                                                                                                                                                                                                                                                                                                                                                                                                                                                                                                                                                                                                                                                                                                                                                                                                                                                                                                                                                                                                                                                                                                                                                                                                                                                     |
| NTR                                                           | The Netherlands<br>Twin Register          | <p>The Netherland Twin Register: would like to thank all study participants for their contributions to our scientific efforts, the SURF SARA institute for computational resources and the Avera institute of Human Genetics for genotyping of samples.</p> <p>Funding was obtained from the Netherlands Organization for Scientific Research (NWO) and The Netherlands Organization for Health Research and Development (ZonMW) grants 904-61-090, 985-10-002, 912-10-020, 904-61-193,480-04-004, 463-06-001, 451-04-034, 400-05-717, Addiction-31160008, 016-115-035, 481-08-011, 400-07-080, 056-32-010, Middelgroot-911-09-032, OCW_NWO Gravity program -024.001.003, NWO-Groot 480-15-001/674, Center for Medical Systems Biology (CSMB, NWO Genomics), NBIC/BioAssist/RK(2008.024), Biobanking and Biomolecular Resources Research Infrastructure (BBMRI -NL, 184.021.007 and 184.033.111), X-Omics 184-034-019; Spinozapremie (NWO- 56-464-14192), KNAW Academy Professor Award (PAH/6635) and University Research Fellow grant (URF) to DIB; Amsterdam Public Health research institute (former EMGO+) , Neuroscience Amsterdam research institute (former NCA); Amsterdam Research &amp; Development (AR&amp;D) research institute; the European Community's Fifth and Seventh Framework Program (FP5- LIFE QUALITY-CT-2002-2006, FP7- HEALTH-F4-2007-2013, grant 01254: GenomEUtwin, grant 01413: ENGAGE and grant 602768: ACTION); the European Research Council (ERC Starting 284167, ERC Consolidator 771057, ERC Advanced 230374), Rutgers University Cell and DNA Repository (NIMH U24 MH068457-06), the National Institutes of Health (NIH, R01D0042157-01A1, R01MH58799-03, MH081802, DA018673, R01 DK092127-04, Grand Opportunity grants 1RC2 MH089951, and 1RC2 MH089995); the Avera Institute for Human Genetics, Sioux Falls, South Dakota (USA). Part of the genotyping and analyses were funded by the Genetic Association Information Network (GAIN) of the Foundation for the National Institutes of Health. Computing was supported by NWO through grant 2018/EW/00408559, BiG Grid, the Dutch e-Science Grid and SURFSARA.</p> |
| ORCADES                                                       | Orkney Complex<br>Disease Study           | <p>DNA extractions were performed at the Genetics Core Laboratory at the Edinburgh Clinical Research Facility, University of Edinburgh, Scotland. We would like to acknowledge the invaluable contributions of the research nurses in Orkney, the administrative team in Edinburgh and the people of Orkney.</p> <p>ORCADES was supported by the Chief Scientist Office of the Scottish Government (CZB/4/276, CZB/4/710), the Royal Society, the MRC Human Genetics Unit, Arthritis Research UK and the European Union framework program 6 EUROSPAN project (contract no. LSHG-CT-2006-018947).</p>                                                                                                                                                                                                                                                                                                                                                                                                                                                                                                                                                                                                                                                                                                                                                                                                                                                                                                                                                                                                                                                                                                                                                                                                                                                                                                                                                                                                                                                                                                                                                      |

|                         |                            |                                                                                                                                                                                                                                                                                                                                                                                                                                                                                                                                                                                                                                                                                                                                                                                                                                                                                                                                                                                                                                                                                                                                                                                                                                                                                                                                                                                                                                                                                                                                                                                                                                                                                                                                                                                                                                                                                                                                                                                                                                                                                                                                                                                                                                                                                                                                                                                                                                                                                                                                                                   |
|-------------------------|----------------------------|-------------------------------------------------------------------------------------------------------------------------------------------------------------------------------------------------------------------------------------------------------------------------------------------------------------------------------------------------------------------------------------------------------------------------------------------------------------------------------------------------------------------------------------------------------------------------------------------------------------------------------------------------------------------------------------------------------------------------------------------------------------------------------------------------------------------------------------------------------------------------------------------------------------------------------------------------------------------------------------------------------------------------------------------------------------------------------------------------------------------------------------------------------------------------------------------------------------------------------------------------------------------------------------------------------------------------------------------------------------------------------------------------------------------------------------------------------------------------------------------------------------------------------------------------------------------------------------------------------------------------------------------------------------------------------------------------------------------------------------------------------------------------------------------------------------------------------------------------------------------------------------------------------------------------------------------------------------------------------------------------------------------------------------------------------------------------------------------------------------------------------------------------------------------------------------------------------------------------------------------------------------------------------------------------------------------------------------------------------------------------------------------------------------------------------------------------------------------------------------------------------------------------------------------------------------------|
| QIMR                    | QIMR Adult Cohort          | <p>We thank the participants and their families for contributing to this research. We also thank A Henders, B Usher, E Souzeau, A Kuot, A McMellon, MJ Wright, MJ Campbell, A Caracella, L Bowdler, S Smith, B Haddon, A Conciatore, D Smyth, H Beeby, O Zheng and B Chapman for their input into project management, databases, phenotype collection, and sample collection, processing and genotyping.</p> <p>The QIMR cohort was supported by National Institutes of Health (NIH) Grants AA07535, AA07728, AA13320, AA13321, AA14041, AA11998, AA17688, DA012854, DA019951, AA010249, AA013320, AA013321, AA011998, AA017688, and DA027995; by Grants from the Australian National Health and Medical Research Council (NHMRC) (241944, 339462, 389927, 389875, 389891, 389892, 389938, 442915, 442981, 496739, 552485, 552498 and 1075175); by Grants from the Australian Research Council (ARC) (A7960034, A79906588, A79801419, DP0770096, DP0212016, and DP0343921); DRN (FT0991022, 613674) SEM (1103623) and GWM (619667) were supported by the ARC Future Fellowship and NHMRC Fellowship Schemes.</p>                                                                                                                                                                                                                                                                                                                                                                                                                                                                                                                                                                                                                                                                                                                                                                                                                                                                                                                                                                                                                                                                                                                                                                                                                                                                                                                                                                                                                                                  |
| RSI / RSII / RSIII      | Rotterdam Study I, 2 and 3 | <p>The Rotterdam Study (PMID: 32367290) is funded by Erasmus Medical Center and Erasmus University, Rotterdam, Netherlands Organization for the Health Research and Development (ZonMw), the Research Institute for Diseases in the Elderly (RIDE), the Ministry of Education, Culture and Science, the Ministry for Health, Welfare and Sports, the European Commission (DG XII), and the Municipality of Rotterdam. The authors are grateful to the study participants, the staff from the Rotterdam Study and the participating general practitioners and pharmacists. The generation and management of GWAS genotype data for the Rotterdam Study (RS I, RS II, RS III) was executed by the Human Genotyping Facility of the Genetic Laboratory of the Department of Internal Medicine, Erasmus MC, Rotterdam, The Netherlands. The GWAS datasets are supported by the Netherlands Organisation of Scientific Research NWO Investments (nr. 175.010.2005.011, 911-03-012), the Genetic Laboratory of the Department of Internal Medicine, Erasmus MC, the Research Institute for Diseases in the Elderly (014-93-015; RIDE2), the Netherlands Genomics Initiative (NGI)/Netherlands Organisation for Scientific Research (NWO) Netherlands Consortium for Healthy Aging (NCHA), project nr. 050-060-810. We thank Pascal Arp, Mila Jhamai, Marijn Verkerk, Lizbeth Herrera and Marjolein Peters, MSc, and Carolina Medina-Gomez, MSc, for their help in creating the GWAS database, and Karol Estrada, PhD, Yurii Aulchenko, PhD, and Carolina Medina-Gomez, MSc, for the creation and analysis of imputed data.</p> <p>The Rotterdam Study has been approved by the Medical Ethics Committee of the Erasmus MC (registration number MEC 02.1015) and by the Dutch Ministry of Health, Welfare and Sport (Population Screening Act WBO, license number 1071272-159521-PG). The Rotterdam Study Personal Registration Data collection is filed with the Erasmus MC Data Protection Officer under registration number EMC1712001. The Rotterdam Study has been entered into the Netherlands National Trial Register (NTR; <a href="http://www.trialregister.nl">www.trialregister.nl</a>) and into the WHO International Clinical Trials Registry Platform (ICTRP; <a href="http://www.who.int/ictrp/network/primary/en/">www.who.int/ictrp/network/primary/en/</a>) under shared catalogue number NTR6831. All participants provided written informed consent to participate in the study and to have their information obtained from treating physicians.</p> |
| SARDINIA                | Sardinia                   | <p>We thank all the volunteers who generously participated in this study and made this research possible.</p> <p>This research was supported by the Intramural Research Program of the NIH, National Institute on Aging, with contracts N01-AG-1-2109 and HHSN271201100005C; by PBO5 InterOmics MIUR Flagship Project and by grant FaReBio2011 "Farmaci e Reti Biotecnologiche di Qualità".</p>                                                                                                                                                                                                                                                                                                                                                                                                                                                                                                                                                                                                                                                                                                                                                                                                                                                                                                                                                                                                                                                                                                                                                                                                                                                                                                                                                                                                                                                                                                                                                                                                                                                                                                                                                                                                                                                                                                                                                                                                                                                                                                                                                                   |
| SASBAC cases / controls |                            | <p>This work was supported by grants from NIH (RO1-CA58427) and the Agency for Science, Technology and Research (A *STAR; Singapore).</p>                                                                                                                                                                                                                                                                                                                                                                                                                                                                                                                                                                                                                                                                                                                                                                                                                                                                                                                                                                                                                                                                                                                                                                                                                                                                                                                                                                                                                                                                                                                                                                                                                                                                                                                                                                                                                                                                                                                                                                                                                                                                                                                                                                                                                                                                                                                                                                                                                         |

|                        |                                      |                                                                                                                                                                                                                                                                                                                                                                                                                                                                                                                                                                                                                                                                                       |
|------------------------|--------------------------------------|---------------------------------------------------------------------------------------------------------------------------------------------------------------------------------------------------------------------------------------------------------------------------------------------------------------------------------------------------------------------------------------------------------------------------------------------------------------------------------------------------------------------------------------------------------------------------------------------------------------------------------------------------------------------------------------|
| SHIP                   | Study of Health in Pomerania         | SHIP is part of the Community Medicine Research net of the University of Greifswald, Germany, which is funded by the Federal Ministry of Education and Research (grants no. 01ZZ9603, 01ZZ0103, and 01ZZ0403), the Ministry of Cultural Affairs as well as the Social Ministry of the Federal State of Mecklenburg-West Pomerania. Genome-wide data have been supported by the Federal Ministry of Education and Research (grant no. 03ZIK012) and a joint grant from Siemens Healthcare, Erlangen, Germany and the Federal State of Mecklenburg- West Pomerania. The University of Greifswald is a member of the Caché Campus program of the InterSystems GmbH.                      |
| SHIP-Trend             | Study of Health in Pomerania - Trend | SHIP is part of the Community Medicine Research net of the University of Greifswald, Germany, which is funded by the Federal Ministry of Education and Research (grants no. 01ZZ9603, 01ZZ0103, and 01ZZ0403), the Ministry of Cultural Affairs as well as the Social Ministry of the Federal State of Mecklenburg-West Pomerania. The University of Greifswald is a member of the Caché Campus program of the InterSystems GmbH.                                                                                                                                                                                                                                                     |
| TWINGENE               | TwinGene                             | TwinGene is part of the Swedish Twin Registry which is managed by Karolinska Institutet and receives funding through the Swedish Research Council under the grant no 2017-00641.<br><br>The Ministry for Higher Education; The Swedish Research Council (M-2005-1112); GenomEUtwin (EU/QLRT-2001-01254; QLG2-CT-2002-01254); NIH DK U01-066134; The Swedish Foundation for Strategic Research (SSF); Heart and Lung foundation no. 20070481                                                                                                                                                                                                                                           |
| TWINSUK                | TwinsUK                              | TwinsUK is funded by the Wellcome Trust, Medical Research Council, European Union, Chronic Disease Research Foundation (CDRF), Zoe Global Ltd and the National Institute for Health Research (NIHR)-funded BioResource, Clinical Research Facility and Biomedical Research Centre based at Guy's and St Thomas' NHS Foundation Trust in partnership with King's College London.                                                                                                                                                                                                                                                                                                       |
| UK Biobank             | UK Biobank                           | This research has been conducted using the UK Biobank resource under application numbers 871 and 9072 (Exeter) and 9797 (Cambridge).                                                                                                                                                                                                                                                                                                                                                                                                                                                                                                                                                  |
| VB                     | Val Borbera                          | We thank all the participants to the project, the San Raffaele Hospital MDs who contributed to clinical data collection, prof. Clara Camaschella who coordinated the data collection, Corrado Masciullo and Massimiliano Cocca for the database informatics.<br><br>The research was supported by funds from Compagnia di San Paolo, Torino, Italy; Fondazione Cariplo, Italy; Telethon Italy; Ministry of Health, Ricerca Finalizzata 2008 and 2011-2012 and Public Health Genomics Project 2010.                                                                                                                                                                                    |
| WGHS                   | Women's Genome Health Study          | The WGHS is supported by the National Heart, Lung, and Blood Institute (HL043851 and HL080467) and the National Cancer Institute (CA047988 and UM1CA182913), with funding for genotyping provided by Amgen. NHLBI/NCI (Buring, Lee, PIs); Amgen (Chasman, Ridker, PIs).                                                                                                                                                                                                                                                                                                                                                                                                               |
| WHI GARNET / WHIMS     | Women's Health Initiative            | The WHI program is funded by the National Heart, Lung, and Blood Institute, National Institutes of Health, U.S. Department of Health and Human Services through contracts HHSN268201600018C, HHSN268201600001C, HHSN268201600002C, HHSN268201600003C, and HHSN268201600004C. The authors thank the WHI investigators and staff for their dedication, and the study participants for making the program possible. A full listing of WHI investigators can be found at: <a href="https://s3-us-west-2.amazonaws.com/www-who-org/wp-content/uploads/WHI-Investigator-Long-List.pdf">https://s3-us-west-2.amazonaws.com/www-who-org/wp-content/uploads/WHI-Investigator-Long-List.pdf</a> |
| China Kadoorie Biobank | China Kadoorie Biobank               | The chief acknowledgment is to the participants, the project staff, and the China National Centre for Disease Control and Prevention (CDC) and its regional offices for assisting with the fieldwork. China's National Health Insurance provides electronic linkage to all hospital treatments. We thank Judith Mackay in Hong Kong; Yu Wang, Gonghuan Yang, Zhengfu Qiang, Lin Feng, Maigeng Zhou, Wenhua Zhao, Yan Zhang and Zheng Bian in China CDC; Lingzhi Kong, Xiucheng Yu, and Kun Li in the Chinese Ministry of Health; and Garry Lancaster, Sarah Clark, Martin Radley, Mike Hill, Hongchao Pan, and Jill Boreham in the CTSU, Oxford, for assisting with the design,       |

|  |  |                                                                                                                                                                                                                                                                                                                                                                                                                                                                                                                                                                                                                                                                                                                                                                                                                                                                                                                                          |
|--|--|------------------------------------------------------------------------------------------------------------------------------------------------------------------------------------------------------------------------------------------------------------------------------------------------------------------------------------------------------------------------------------------------------------------------------------------------------------------------------------------------------------------------------------------------------------------------------------------------------------------------------------------------------------------------------------------------------------------------------------------------------------------------------------------------------------------------------------------------------------------------------------------------------------------------------------------|
|  |  | <p>planning, organisation, and conduct of the study.</p> <p>The CKB baseline survey and the first re-survey were supported by the Kadoorie Charitable Foundation, Hong Kong. Long-term follow-up was supported by UK Wellcome Trust( 212946/Z/18/Z, 202922/Z/16/Z, 104085/Z/14/Z, 088158/Z/09/Z), National Key Research and Development Program of China (2016YFC0900500, 2016YFC0900501, 2016YFC0900504, 2016YFC1303904) and National Natural Science Foundation of China (91843302). DNA extraction and genotyping was funded by GlaxoSmithKline, and the UK Medical Research Council (MC-PC-13049, MC-PC-14135). The project is supported by core funding from UK Medical Research Council (MC_UU_00017/1,MC_UU_12026/2 MC_U137686851), Cancer Research UK (C16077/A29186; C500/A16896), and British Heart Foundation (CH/1996001/9454) to the Clinical Trial Service Unit and Epidemiological Studies Unit at Oxford University.</p> |
|--|--|------------------------------------------------------------------------------------------------------------------------------------------------------------------------------------------------------------------------------------------------------------------------------------------------------------------------------------------------------------------------------------------------------------------------------------------------------------------------------------------------------------------------------------------------------------------------------------------------------------------------------------------------------------------------------------------------------------------------------------------------------------------------------------------------------------------------------------------------------------------------------------------------------------------------------------------|

## 2) Acknowledgments and sources of funding for studies included in Breast Cancer Association Consortium

| Study acronym | Full study name                       | Acknowledgments and sources of funding                                                                                                                                                                                                                                                                                                                                                                                                                                                                                                                                                                                                                                                                                                                                                                                                                                                                                                                                                                                                                                                                                                                                                                                                                                                                                                                                                                                                                                                                                                                                              |
|---------------|---------------------------------------|-------------------------------------------------------------------------------------------------------------------------------------------------------------------------------------------------------------------------------------------------------------------------------------------------------------------------------------------------------------------------------------------------------------------------------------------------------------------------------------------------------------------------------------------------------------------------------------------------------------------------------------------------------------------------------------------------------------------------------------------------------------------------------------------------------------------------------------------------------------------------------------------------------------------------------------------------------------------------------------------------------------------------------------------------------------------------------------------------------------------------------------------------------------------------------------------------------------------------------------------------------------------------------------------------------------------------------------------------------------------------------------------------------------------------------------------------------------------------------------------------------------------------------------------------------------------------------------|
| BCAC          | Breast Cancer Association Consortium  | <p>We thank all the individuals who took part in these studies and all the researchers, clinicians, technicians and administrative staff who have enabled this work to be carried out.</p> <p>BCAC is funded by the European Union's Horizon 2020 Research and Innovation Programme (grant numbers 634935 and 633784 for BRIDGES and B-CAST respectively), and PERSPECTIVE I&amp;I, funded by the Government of Canada through Genome Canada and the Canadian Institutes of Health Research, the Ministère de l'Économie et de l'Innovation du Québec through Genome Québec, the Quebec Breast Cancer Foundation. The EU Horizon 2020 Research and Innovation Programme funding source had no role in study design, data collection, data analysis, data interpretation or writing of the report. Additional funding for BCAC is provided via the Confluence project which is funded with intramural funds from the National Cancer Institute Intramural Research Program, National Institutes of Health. The breast cancer genome-wide association analyses were supported by the Government of Canada through Genome Canada and the Canadian Institutes of Health Research, the 'Ministère de l'Économie, de la Science et de l'Innovation du Québec' through Genome Québec and grant PSR-SIIRI-701, The National Institutes of Health (U19 CA148065, X01HG007492), Cancer Research UK (C1287/A10118, C1287/A16563, C1287/A10710) and the European Union (HEALTH-F2-2009-223175 and H2020 633784 and 634935). All studies and funders are listed in Michailidou et al (2017).</p> |
| ABCFS         | Australian Breast Cancer Family Study | <p>ABCFS thank Maggie Angelakos, Judi Maskiell, Gillian Dite.</p> <p>The Australian Breast Cancer Family Study (ABCFS) was supported by grant UM1 CA164920 from the National Cancer Institute (USA). The content of this manuscript does not necessarily reflect the views or policies of the National Cancer Institute or any of the collaborating centers in the Breast Cancer Family Registry (BCFR), nor does mention of trade names, commercial products, or organizations imply endorsement by the USA Government or the BCFR. The ABCFS was also supported by the National Health and Medical Research Council of Australia, the New South Wales Cancer Council, the Victorian Health Promotion Foundation (Australia) and the Victorian Breast Cancer Research Consortium. J.L.H. is a National Health and Medical Research Council (NHMRC) Senior Principal Research Fellow. M.C.S. is a NHMRC Senior Research Fellow.</p>                                                                                                                                                                                                                                                                                                                                                                                                                                                                                                                                                                                                                                                 |
| ABCS          |                                       | <p>ABCS thanks the Blood bank Sanquin, The Netherlands.</p> <p>The ABCS study was supported by the Dutch Cancer Society [grants NKI 2007-3839; 2009 4363].</p>                                                                                                                                                                                                                                                                                                                                                                                                                                                                                                                                                                                                                                                                                                                                                                                                                                                                                                                                                                                                                                                                                                                                                                                                                                                                                                                                                                                                                      |

|         |                                  |                                                                                                                                                                                                                                                                                                                                                                                                                                                                                                                                                                                                                                                                                                                                                                                                                                                                                                                                                                                                                                                                                                                                                                                                                                                                                                                                                                                                                                                                                                                                                                                                                                                                                                                                                                      |
|---------|----------------------------------|----------------------------------------------------------------------------------------------------------------------------------------------------------------------------------------------------------------------------------------------------------------------------------------------------------------------------------------------------------------------------------------------------------------------------------------------------------------------------------------------------------------------------------------------------------------------------------------------------------------------------------------------------------------------------------------------------------------------------------------------------------------------------------------------------------------------------------------------------------------------------------------------------------------------------------------------------------------------------------------------------------------------------------------------------------------------------------------------------------------------------------------------------------------------------------------------------------------------------------------------------------------------------------------------------------------------------------------------------------------------------------------------------------------------------------------------------------------------------------------------------------------------------------------------------------------------------------------------------------------------------------------------------------------------------------------------------------------------------------------------------------------------|
| BBCC    |                                  | The work of the BBCC was partly funded by ELAN-Fond of the University Hospital of Erlangen.                                                                                                                                                                                                                                                                                                                                                                                                                                                                                                                                                                                                                                                                                                                                                                                                                                                                                                                                                                                                                                                                                                                                                                                                                                                                                                                                                                                                                                                                                                                                                                                                                                                                          |
| BCINIS  |                                  | The BCINIS study would not have been possible without the contributions of Dr. K. Landsman, Dr. N. Gronich, Dr. A. Flugelman, Dr. W. Saliba, Dr. E. Liani, Dr. I. Cohen, Dr. S. Kalet, Dr. V. Friedman, Dr. O. Barnet of the NICCC in Haifa, and all the contributing family medicine, surgery, pathology and oncology teams in all medical institutes in Northern Israel. BIGGS thanks Niall McInerney, Gabrielle Colleran, Andrew Rowan, Angela Jones.                                                                                                                                                                                                                                                                                                                                                                                                                                                                                                                                                                                                                                                                                                                                                                                                                                                                                                                                                                                                                                                                                                                                                                                                                                                                                                             |
| BREOGAN | BREast Oncology GALician Network | <p>The BREOGAN study would not have been possible without the contributions of the following: Manuela Gago-Dominguez, Jose Esteban Castelao, Angel Carracedo, Victor Muñoz Garzón, Alejandro Novo Domínguez, María Elena Martínez, Sara Miranda Ponte, Carmen Redondo Marey, Maite Peña Fernández, Manuel Enguix Castelo, María Torres, Manuel Calaza (BREOGAN), José Antúnez, Máximo Fraga and the staff of the Department of Pathology and Biobank of the University Hospital Complex of Santiago-CHUS, Instituto de Investigación Sanitaria de Santiago, IDIS, Xerencia de Xestión Integrada de Santiago-SERGAS; Joaquín González-Carreró and the staff of the Department of Pathology and Biobank of University Hospital Complex of Vigo, Instituto de Investigación Biomedica Galicia Sur, SERGAS, Vigo, Spain.</p> <p>The BREast Oncology GALician Network (BREOGAN) is funded by Acción Estratégica de Salud del Instituto de Salud Carlos III FIS PI12/02125/Cofinanciado FEDER; Acción Estratégica de Salud del Instituto de Salud Carlos III FIS Intrasalud (PI13/01136); Programa Grupos Emergentes, Cancer Genetics Unit, Instituto de Investigación Biomedica Galicia Sur. Xerencia de Xestión Integrada de Vigo-SERGAS, Instituto de Salud Carlos III, Spain; Grant 10CSA012E, Consellería de Industria Programa Sectorial de Investigación Aplicada, PEME I + D e I + D Suma del Plan Gallego de Investigación, Desarrollo e Innovación Tecnológica de la Consellería de Industria de la Xunta de Galicia, Spain; Grant EC11-192. Fomento de la Investigación Clínica Independiente, Ministerio de Sanidad, Servicios Sociales e Igualdad, Spain; and Grant FEDER-Interconecta. Ministerio de Economía y Competitividad, Xunta de Galicia, Spain.</p> |
| CBCS    | Canadian Breast Cancer Study     | <p>CBCS thanks study participants, co-investigators, collaborators and staff of the Canadian Breast Cancer Study, and project coordinators Agnes Lai and Celine Morissette.</p> <p>CBCS is funded by the Canadian Cancer Society (grant # 313404) and the Canadian Institutes of Health Research.</p>                                                                                                                                                                                                                                                                                                                                                                                                                                                                                                                                                                                                                                                                                                                                                                                                                                                                                                                                                                                                                                                                                                                                                                                                                                                                                                                                                                                                                                                                |
| CCGP    |                                  | <p>CCGP thanks Styliani Apostolaki, Anna Margiolaki, Georgios Nintos, Maria Perraki, Georgia Saloustrou, Georgia Sevastaki, Konstantinos Pompodakis.</p> <p>CCGP is supported by funding from the University of Crete.</p>                                                                                                                                                                                                                                                                                                                                                                                                                                                                                                                                                                                                                                                                                                                                                                                                                                                                                                                                                                                                                                                                                                                                                                                                                                                                                                                                                                                                                                                                                                                                           |
| CECILE  |                                  | The CECILE study was supported by Fondation de France, Institut National du Cancer (INCa), Ligue Nationale contre le Cancer, Agence Nationale de Sécurité Sanitaire, de l'Alimentation, de l'Environnement et du Travail (ANSES), Agence Nationale de la Recherche (ANR).                                                                                                                                                                                                                                                                                                                                                                                                                                                                                                                                                                                                                                                                                                                                                                                                                                                                                                                                                                                                                                                                                                                                                                                                                                                                                                                                                                                                                                                                                            |
| CGPS    |                                  | <p>CGPS thanks staff and participants of the Copenhagen General Population Study. For the excellent technical assistance: Dorthe Uldall Andersen, Maria Birna Arnadottir, Anne Bank, Dorthe Kjeldgård Hansen. The Danish Cancer Biobank is acknowledged for providing infrastructure for the collection of blood samples for the cases.</p> <p>The CGPS was supported by the Chief Physician Johan Boserup and Lise Boserup Fund, the Danish Medical Research Council, and Herlev and Gentofte Hospital.</p>                                                                                                                                                                                                                                                                                                                                                                                                                                                                                                                                                                                                                                                                                                                                                                                                                                                                                                                                                                                                                                                                                                                                                                                                                                                         |
| CPSII   |                                  | Investigators from the CPS-II cohort thank the participants and Study Management Group for their invaluable contributions to this research. They also acknowledge the contribution to this study from central cancer registries supported through the Centers for Disease Control and Prevention National Program of Cancer Registries, as well as cancer registries supported by the National Cancer Institute Surveillance Epidemiology and End Results program.                                                                                                                                                                                                                                                                                                                                                                                                                                                                                                                                                                                                                                                                                                                                                                                                                                                                                                                                                                                                                                                                                                                                                                                                                                                                                                   |



|                  |                                      |                                                                                                                                                                                                                                                                                                                                                                                                                                                                                                                                                                                                                                                                                                                                                                                                                                                                                                                                                                                                                                                                                                                                                                                                                                                                                                 |
|------------------|--------------------------------------|-------------------------------------------------------------------------------------------------------------------------------------------------------------------------------------------------------------------------------------------------------------------------------------------------------------------------------------------------------------------------------------------------------------------------------------------------------------------------------------------------------------------------------------------------------------------------------------------------------------------------------------------------------------------------------------------------------------------------------------------------------------------------------------------------------------------------------------------------------------------------------------------------------------------------------------------------------------------------------------------------------------------------------------------------------------------------------------------------------------------------------------------------------------------------------------------------------------------------------------------------------------------------------------------------|
|                  |                                      | The American Cancer Society funds the creation, maintenance, and updating of the CPS-II cohort.                                                                                                                                                                                                                                                                                                                                                                                                                                                                                                                                                                                                                                                                                                                                                                                                                                                                                                                                                                                                                                                                                                                                                                                                 |
| DIETCOMPLYF      |                                      | The DietComplyf study was funded by the charity Against Breast Cancer (Registered Charity Number 1121258) and the NCRN.<br><br>The University of Westminster curates the DietComplyf database funded by Against Breast Cancer Registered Charity No. 1121258 and the NCRN.                                                                                                                                                                                                                                                                                                                                                                                                                                                                                                                                                                                                                                                                                                                                                                                                                                                                                                                                                                                                                      |
| ICICLE           |                                      | ICICLE thanks Kelly Kohut, Michele Caneppele, Maria Troy.<br><br>ICICLE was supported by Breast Cancer Now, CRUK and Biomedical Research Centre at Guy's and St Thomas' NHS Foundation Trust and King's College London.                                                                                                                                                                                                                                                                                                                                                                                                                                                                                                                                                                                                                                                                                                                                                                                                                                                                                                                                                                                                                                                                         |
| KARBAC           |                                      | Financial support for KARBAC was provided through the regional agreement on medical training and clinical research (ALF) between Stockholm County Council and Karolinska Institutet, the Swedish Cancer Society, The Gustav V Jubilee foundation and Bert von Kantzows foundation.                                                                                                                                                                                                                                                                                                                                                                                                                                                                                                                                                                                                                                                                                                                                                                                                                                                                                                                                                                                                              |
| KARMA            |                                      | KARMA and SASBAC thank the Swedish Medical Research Counsel.<br><br>The KARMA study was supported by Märit and Hans Rausings Initiative Against Breast Cancer.                                                                                                                                                                                                                                                                                                                                                                                                                                                                                                                                                                                                                                                                                                                                                                                                                                                                                                                                                                                                                                                                                                                                  |
| KBCP             |                                      | KBCP thanks Eija Myöhänen, Helena Kemiläinen.<br><br>The KBCP was financially supported by the special Government Funding (EVO) of Kuopio University Hospital grants, Cancer Fund of North Savo, the Finnish Cancer Organizations, and by the strategic funding of the University of Eastern Finland.                                                                                                                                                                                                                                                                                                                                                                                                                                                                                                                                                                                                                                                                                                                                                                                                                                                                                                                                                                                           |
| KCONFAB/<br>AOCS |                                      | kConFab/AOCS wish to thank Heather Thorne, Eveline Niedermayr, all the kConFab research nurses and staff, the heads and staff of the Family Cancer Clinics, and the Clinical Follow Up Study (which has received funding from the NHMRC, the National Breast Cancer Foundation, Cancer Australia, and the National Institute of Health (USA)) for their contributions to this resource, and the many families who contribute to kConFab.<br><br>kConFab is supported by a grant from the National Breast Cancer Foundation, and previously by the National Health and Medical Research Council (NHMRC), the Queensland Cancer Fund, the Cancer Councils of New South Wales, Victoria, Tasmania and South Australia, and the Cancer Foundation of Western Australia. Financial support for the AOCS was provided by the United States Army Medical Research and Materiel Command [DAMD17-01-1-0729], Cancer Council Victoria, Queensland Cancer Fund, Cancer Council New South Wales, Cancer Council South Australia, The Cancer Foundation of Western Australia, Cancer Council Tasmania and the National Health and Medical Research Council of Australia (NHMRC; 400413, 400281, 199600). G.C.T. and P.W. are supported by the NHMRC. RB was a Cancer Institute NSW Clinical Research Fellow. |
| MARIE            |                                      | MARIE thanks Petra Seibold, Dieter Flesch-Janys, Judith Heinz, Nadia Obi, Alina Vrieling, Sabine Behrens, Ursula Eilber, Muhabbet Celik, Til Olchers and Stefan Nickels.<br><br>The MARIE study was supported by the Deutsche Krebshilfe e.V. [70-2892-BR I, 106332, 108253, 108419, 110826, 110828], the Hamburg Cancer Society, the German Cancer Research Center (DKFZ) and the Federal Ministry of Education and Research (BMBF) Germany [01KH0402].                                                                                                                                                                                                                                                                                                                                                                                                                                                                                                                                                                                                                                                                                                                                                                                                                                        |
| MCBCS            |                                      | The MCBCS was supported by the NIH grants CA192393, CA116167, CA176785 an NIH Specialized Program of Research Excellence (SPORE) in Breast Cancer [CA116201], and the Breast Cancer Research Foundation and a generous gift from the David F. and Margaret T. Grohne Family Foundation.                                                                                                                                                                                                                                                                                                                                                                                                                                                                                                                                                                                                                                                                                                                                                                                                                                                                                                                                                                                                         |
| MCCS             | Melbourne Collaborative Cohort Study | The MCCS was made possible by the contribution of many people, including the original investigators, the teams that recruited the participants and continue working on follow-up, and the many thousands of Melbourne residents who continue to participate in the study.<br><br>The Melbourne Collaborative Cohort Study (MCCS) cohort recruitment was funded by VicHealth and Cancer Council Victoria. The MCCS was further augmented by Australian National Health and Medical Research Council grants 209057, 396414 and                                                                                                                                                                                                                                                                                                                                                                                                                                                                                                                                                                                                                                                                                                                                                                    |

|                 |                                                                                                                 |                                                                                                                                                                                                                                                                                                                                                                                                                                                                                                                                                                                                                                          |
|-----------------|-----------------------------------------------------------------------------------------------------------------|------------------------------------------------------------------------------------------------------------------------------------------------------------------------------------------------------------------------------------------------------------------------------------------------------------------------------------------------------------------------------------------------------------------------------------------------------------------------------------------------------------------------------------------------------------------------------------------------------------------------------------------|
|                 |                                                                                                                 | 1074383 and by infrastructure provided by Cancer Council Victoria. Cases and their vital status were ascertained through the Victorian Cancer Registry and the Australian Institute of Health and Welfare, including the National Death Index and the Australian Cancer Database.                                                                                                                                                                                                                                                                                                                                                        |
| MEC             |                                                                                                                 | The MEC was supported by NIH grants CA63464, CA54281, CA098758, CA132839 and CA164973.                                                                                                                                                                                                                                                                                                                                                                                                                                                                                                                                                   |
| MISS            |                                                                                                                 | The MISS study is supported by funding from ERC-2011-294576 Advanced grant, Swedish Cancer Society, Swedish Research Council, Local hospital funds, Berta Kamprad Foundation, Gunnar Nilsson.                                                                                                                                                                                                                                                                                                                                                                                                                                            |
| MMHS            |                                                                                                                 | We thank the coordinators, the research staff and especially the MMHS participants for their continued collaboration on research studies in breast cancer.<br><br>The MMHS study was supported by NIH grants CA97396, CA128931, CA116201, CA140286 and CA177150. MSKCC is supported by grants from the Breast Cancer Research Foundation and Robert and Kate Niehaus Clinical Cancer Genetics Initiative.                                                                                                                                                                                                                                |
| NC-BCFR & OFBCR | Northern California Breast Cancer Family Registry (NC-BCFR) and Ontario Familial Breast Cancer Registry (OFBCR) | The Northern California Breast Cancer Family Registry (NC-BCFR) and Ontario Familial Breast Cancer Registry (OFBCR) were supported by grants U01CA164920 and U01CA167551 from the USA National Cancer Institute of the National Institutes of Health. The content of this manuscript does not necessarily reflect the views or policies of the National Cancer Institute or any of the collaborating centers in the Breast Cancer Family Registry (BCFR) or the Colon Cancer Family Registry (CCFR), nor does mention of trade names, commercial products, or organizations imply endorsement by the USA Government or the BCFR or CCFR. |
| NCBCS           | Carolina Breast Cancer Study (NCBCS)                                                                            | The Carolina Breast Cancer Study (NCBCS) was funded by Komen Foundation, the National Cancer Institute (P50 CA058223, U54 CA156733, U01 CA179715), and the North Carolina University Cancer Research Fund.                                                                                                                                                                                                                                                                                                                                                                                                                               |
| OFBCR           |                                                                                                                 | The OFBCR thanks Teresa Selander, Nayana Weerasooriya and Steve Gallinger. ORIGO thanks E. Krol-Warmerdam, and J. Blom for patient accrual, administering questionnaires, and managing clinical information.                                                                                                                                                                                                                                                                                                                                                                                                                             |
| PBCS            |                                                                                                                 | PBCS thanks Louise Brinton, Mark Sherman, Neonila Szeszenia-Dabrowska, Beata Peplonska, Witold Zatonski, Pei Chao, Michael Stagner.<br><br>The PBCS was funded by Intramural Research Funds of the National Cancer Institute, Department of Health and Human Services, USA.                                                                                                                                                                                                                                                                                                                                                              |
| PKARMA          |                                                                                                                 |                                                                                                                                                                                                                                                                                                                                                                                                                                                                                                                                                                                                                                          |
| PLCO            |                                                                                                                 | Genotyping for PLCO was supported by the Intramural Research Program of the National Institutes of Health, NCI, Division of Cancer Epidemiology and Genetics. The PLCO is supported by the Intramural Research Program of the Division of Cancer Epidemiology and Genetics and supported by contracts from the Division of Cancer Prevention, National Cancer Institute, National Institutes of Health.                                                                                                                                                                                                                                  |
| SASBAC          |                                                                                                                 | The SASBAC study was supported by funding from the Agency for Science, Technology and Research of Singapore (A*STAR), the US National Institute of Health (NIH) and the Susan G. Komen Breast Cancer Foundation.                                                                                                                                                                                                                                                                                                                                                                                                                         |
| SBCS            |                                                                                                                 | SBCS thanks Sue Higham, Helen Cramp, Dan Connley, Ian Brock, Sabapathy Balasubramanian and Malcolm W.R. Reed.<br><br>The SBCS was supported by Sheffield Experimental Cancer Medicine Centre and Breast Cancer Now Tissue Bank.                                                                                                                                                                                                                                                                                                                                                                                                          |
| SEARCH          |                                                                                                                 | We thank the SEARCH and EPIC teams.<br><br>SEARCH is funded by Cancer Research UK [C490/A10124, C490/A16561] and supported by the UK National Institute for Health Research Biomedical Research Centre at the University of Cambridge. The University of Cambridge has received salary support for PDPP from the NHS in the East of England through the Clinical Academic Reserve.                                                                                                                                                                                                                                                       |
| SISTER          | The Sister Study                                                                                                | The Sister Study (SISTER) is supported by the Intramural Research Program of the NIH, National Institute of Environmental Health Sciences (Z01-ES044005 and Z01-                                                                                                                                                                                                                                                                                                                                                                                                                                                                         |

|       |  |                                                                                                                                                                                                                                                                                                                                                                                                                                                                                                                                                                            |
|-------|--|----------------------------------------------------------------------------------------------------------------------------------------------------------------------------------------------------------------------------------------------------------------------------------------------------------------------------------------------------------------------------------------------------------------------------------------------------------------------------------------------------------------------------------------------------------------------------|
|       |  | ES049033).                                                                                                                                                                                                                                                                                                                                                                                                                                                                                                                                                                 |
| SMC   |  | The SMC is funded by the Swedish Cancer Foundation and the Swedish Research Council (VR 2017-00644) grant for the Swedish Infrastructure for Medical Population-based Life-course Environmental Research (SIMPLER).                                                                                                                                                                                                                                                                                                                                                        |
| UKBGS |  | <p>UKBGS thanks Breast Cancer Now and the Institute of Cancer Research for support and funding of the Breakthrough Generations Study, and the study participants, study staff, and the doctors, nurses and other health care providers and health information sources who have contributed to the study. We acknowledge NHS funding to the Royal Marsden/ICR NIHR Biomedical Research Centre.</p> <p>The UKBGS is funded by Breast Cancer Now and the Institute of Cancer Research (ICR), London. ICR acknowledges NHS funding to the NIHR Biomedical Research Centre.</p> |
| USRT  |  | The USRT Study was funded by Intramural Research Funds of the National Cancer Institute, Department of Health and Human Services, USA.                                                                                                                                                                                                                                                                                                                                                                                                                                     |

### 3) Further acknowledgments and sources of funding

#### *Genome-wide analyses*

Exeter:

Robin N. Beaumont is funded by the Wellcome Trust and Royal Society grant: 104150/Z/14/Z. Anna Murray is supported by the Wellcome Trust Institutional Strategic Support Award (WT097835MF). Katherine S. Ruth was supported by funding from the Gillings Family Foundation, MRC P2D and is supported by Cancer Research UK [grant number C18281/A29019]. Jessica Tyrrell is supported by an Academy of Medical Sciences (AMS) Springboard award, which is supported by the AMS, the Wellcome Trust, GCRF, the Government Department of Business, Energy and Industrial Strategy, the British Heart Foundation and Diabetes UK [SBF004\1079]. Andrew R. Wood is supported by the European Research Council grants: SZ-245 50371-GLUCOSEGENES-FP7-IDEAS-ERC and 323195. The authors acknowledge the use of the University of Exeter High-Performance Computing facility in carrying out this work.

Edinburgh:

Caroline Hayward, Veronique Vitart and James F. Wilson are supported by an MRC University Unit Programme Grant MC\_UU\_00007/10 (QTL in Health and Disease).

Cambridge:

Claudia Langenberg and Nicholas J Wareham are funded by the Medical Research Council (MC\_UU\_12015/1 and MC\_UU\_00006/1). Nicholas J Wareham is a NIHR Senior Investigator.

Ken Ong, John Perry, Stasa Stankovic and Felix Day are supported by the Medical Research Council (Unit programmes: MC\_UU\_12015/2 and MC\_UU\_00006/2).

#### *Mouse models of environmentally-induced low ovarian reserve:*

Catherine Aiken and Susan Ozanne are funded by grants from the Academy of Medical Sciences, the Addenbrooke's Charitable Trust, an Isaac Newton Trust/Wellcome Trust ISSF/ University of Cambridge Joint Research Grant and the MRC (MRC\_MC\_UU\_12012/4 and MRC\_MC\_UU\_00014/4) and supported by the NIHR Cambridge Biomedical Research Centre. The views expressed are those of the author(s) and not necessarily those of the NIHR or the Department of Health and Social Care.

#### *Mouse models of DNA damage response and ovarian ageing:*

Jazib Hussain is the recipient of an international PhD fellowship from the Punjab Educational Endowment Fund, Pakistan. Members of the Eva R Hoffmann were funded by an ERC Consolidator Grant (724718-ReCAP), a Novo Nordisk Foundation Young Investigator Award (NNF15OC0016662), and IRFD-FSS (0134-00299B). They acknowledge the support with histology from Pernille Sjølin Froh and Thi Cam Ha Nguyen at their Department. Andres Lopez-Contreras was funded by an ERC Starter grant (ERC-2015-STG-679068) and Nordea Fonden (02-2017-1749). Paula Aguilera was supported by a Juan de la Cierva postdoctoral contract from the Spanish Ministry of Science and Innovation. Eva R Hoffmann and Andres Lopez-Contreras acknowledge core funding from the Danish National Research Foundation Center Grant (6110-00344B). Jeremy A. Daniel was supported by the Novo Nordisk Foundation (grant agreement NFF14CC0001). Satoshi H. Namekawa was funded by the National Institutes of Health (R01 GM098605). Petr Solc and Lucie Knoblochova were funded by The Institutional Research Concept RVO67985904 and grant #20-27742S from the Grant Agency of the

Czech Republic. Lucie Knoblochova was supported by the Charles University, project GA UK No. 1402217. Claus Yding Andersen, Marie Louise Grøndahl, Kristina W. Olsen, Eva R. Hoffmann acknowledge funding from Ferring Pharmaceuticals and ReproUnion ([www.reprounion.eu](http://www.reprounion.eu)). Kristina W. Olsen was a recipient of a fellowship from Helsefonden (20-B-0334). Yan Huang is a recipient of a fellowship of the China Scholarship Council (201607040048). Ignasi Roig was supported by the Spanish Ministerio de Ciencia e Innovación (BFU2013-43965-P, BFU2016-80370-P and PID2019-107082RB-I00) and a fellowship of the Fundación Dexeus Mujer.

#### **4 ) Individual study disclosures**

Joanne M Murabito discloses a consulting relationship with Merck as a guest lecturer.

Deborah J. Thompson is now employed by Genomics plc.

Pierre Fontanillas is employed by and hold stock or stock options in 23andMe, Inc.

All other authors and studies declared no conflict of interest.

## 5) Consortium membership

### **Biobank-based Integrative Omics Study (BIOS) Consortium**

**Management Team** Bastiaan T. Heijmans (chair)<sup>1</sup>, Peter A.C. 't Hoen<sup>2</sup>, Joyce van Meurs<sup>3</sup>, Aaron Isaacs<sup>4</sup>, Rick Jansen<sup>5</sup>, Lude Franke<sup>6</sup>.

**Cohort collection** Dorret I. Boomsma<sup>7</sup>, René Pool<sup>7</sup>, Jenny van Dongen<sup>7</sup>, Jouke J. Hottenga<sup>7</sup> (Netherlands Twin Register); Marleen MJ van Greevenbroek<sup>8</sup>, Coen D.A. Stehouwer<sup>8</sup>, Carla J.H. van der Kallen<sup>8</sup>, Casper G. Schalkwijk<sup>8</sup> (Cohort study on Diabetes and Atherosclerosis Maastricht); Cisca Wijmenga<sup>6</sup>, Lude Franke<sup>6</sup>, Sasha Zhernakova<sup>6</sup>, Etti F. Tigchelaar<sup>6</sup> (LifeLines Deep); P. Eline Slagboom<sup>1</sup>, Marian Beekman<sup>1</sup>, Joris Deelen<sup>1</sup>, Diana van Heemst<sup>9</sup> (Leiden Longevity Study); Jan H. Veldink<sup>10</sup>, Leonard H. van den Berg<sup>10</sup> (Prospective ALS Study Netherlands); Cornelia M. van Duijn<sup>4</sup>, Bert A. Hofman<sup>11</sup>, Aaron Isaacs<sup>4</sup>, André G. Uitterlinden<sup>3</sup> (Rotterdam Study).

**Data Generation** Joyce van Meurs (Chair)<sup>3</sup>, P. Mila Jhamai<sup>3</sup>, Michael Verbiest<sup>3</sup>, H. Eka D. Suchiman<sup>1</sup>, Marijn Verkerk<sup>3</sup>, Ruud van der Breggen<sup>1</sup>, Jeroen van Rooij<sup>3</sup>, Nico Lakenberg<sup>1</sup>.  
Data management and computational infrastructure Hailiang Mei (Chair)<sup>12</sup>, Maarten van Iterson<sup>1</sup>, Michiel van Galen<sup>2</sup>, Jan Bot<sup>13</sup>, Dasha V. Zhernakova<sup>6</sup>, Rick Jansen<sup>5</sup>, Peter van 't Hof<sup>12</sup>, Patrick Deelen<sup>6</sup>, Irene Nooren<sup>13</sup>, Peter A.C. 't Hoen<sup>2</sup>, Bastiaan T. Heijmans<sup>1</sup>, Matthijs Moed<sup>1</sup>.

**Data Analysis Group** Lude Franke (Co-Chair)<sup>6</sup>, Martijn Vermaat<sup>2</sup>, Dasha V. Zhernakova<sup>6</sup>, René Luijk<sup>1</sup>, Marc Jan Bonder<sup>6</sup>, Maarten van Iterson<sup>1</sup>, Patrick Deelen<sup>6</sup>, Freerk van Dijk<sup>14</sup>, Michiel van Galen<sup>2</sup>, Wibowo Arindrarto<sup>12</sup>, Szymon M. Kielbasa<sup>15</sup>, Morris A. Swertz<sup>14</sup>, Erik. W van Zwet<sup>15</sup>, Rick Jansen<sup>5</sup>, Peter-Bram 't Hoen (Co-Chair)<sup>2</sup>, Bastiaan T. Heijmans (Co-Chair)<sup>1</sup>.

1. Molecular Epidemiology Section, Department of Medical Statistics and Bioinformatics, Leiden University Medical Center, Leiden, The Netherlands
2. Department of Human Genetics, Leiden University Medical Center, Leiden, The Netherlands
3. Department of Internal Medicine, ErasmusMC, Rotterdam, The Netherlands
4. Department of Genetic Epidemiology, ErasmusMC, Rotterdam, The Netherlands
5. Department of Psychiatry, VU University Medical Center, Neuroscience Campus Amsterdam, Amsterdam, The Netherlands
6. Department of Genetics, University of Groningen, University Medical Centre Groningen, Groningen, The Netherlands
7. Department of Biological Psychology, VU University Amsterdam, Neuroscience Campus Amsterdam, Amsterdam, The Netherlands
8. Department of Internal Medicine and School for Cardiovascular Diseases (CARIM), Maastricht University Medical Center, Maastricht, The Netherlands
9. Department of Gerontology and Geriatrics, Leiden University Medical Center, Leiden, The Netherlands
10. Department of Neurology, Brain Center Rudolf Magnus, University Medical Center Utrecht, Utrecht, The Netherlands
11. Department of Epidemiology, ErasmusMC, Rotterdam, The Netherlands
12. Sequence Analysis Support Core, Leiden University Medical Center, Leiden, The Netherlands
13. SURFsara, Amsterdam, the Netherlands
14. Genomics Coordination Center, University Medical Center Groningen, University of Groningen, Groningen, the Netherlands
15. Medical Statistics Section, Department of Medical Statistics and Bioinformatics, Leiden University Medical Center, Leiden, The Netherlands

## eQTLGen Consortium

Mawussé Agbessi<sup>1</sup>, Habibul Ahsan<sup>2</sup>, Isabel Alves<sup>1</sup>, Anand Andiappan<sup>3</sup>, Wibowo Arindrarto<sup>4</sup>, Philip Awadalla<sup>1</sup>, Alexis Battle<sup>5,6</sup>, Frank Beutner<sup>7</sup>, Marc Jan Bonder<sup>8,9,10</sup>, Dorret Boomsma<sup>11</sup>, Mark Christiansen<sup>12</sup>, Annique Claringbould<sup>8</sup>, Patrick Deelen<sup>8,13</sup>, Tõnu Esko<sup>14</sup>, Marie-Julie Favé<sup>1</sup>, Lude Franke<sup>8</sup>, Timothy Frayling<sup>15</sup>, Sina A. Gharib<sup>16,12</sup>, Gregory Gibson<sup>17</sup>, Bastiaan T. Heijmans<sup>4</sup>, Gibran Hemani<sup>18</sup>, Rick Jansen<sup>19</sup>, Mika Kähönen<sup>20,21</sup>, Anette Kalnapenkis<sup>14</sup>, Silva Kasela<sup>14</sup>, Johannes Kettunen<sup>22</sup>, Yungil Kim<sup>6,23</sup>, Holger Kirsten<sup>24</sup>, Peter Kovacs<sup>25</sup>, Knut Krohn<sup>26</sup>, Jaanika Kronberg-Guzman<sup>14</sup>, Viktorija Kukushkina<sup>14</sup>, Zoltan Kutalik<sup>27</sup>, Bennett Lee<sup>3</sup>, Terho Lehtimäki<sup>28,29</sup>, Markus Loeffler<sup>24</sup>, Urko M. Marigorta<sup>17</sup>, Hailang Mei<sup>4</sup>, Lili Milani<sup>14</sup>, Grant W. Montgomery<sup>30</sup>, Martina Müller-Nurasyid<sup>31,32,33</sup>, Matthias Nauck<sup>34</sup>, Michel Nivard<sup>11</sup>, Brenda Penninx<sup>19</sup>, Markus Perola<sup>35</sup>, Natalia Pervjakova<sup>14</sup>, Brandon L. Pierce<sup>2</sup>, Joseph Powell<sup>36</sup>, Holger Prokisch<sup>37,38</sup>, Bruce M. Psaty<sup>12,39,40</sup>, Olli T. Raitakari<sup>41,42</sup>, Samuli Ripatti<sup>43</sup>, Olaf Rotzschke<sup>3</sup>, Sina Rüeger<sup>27</sup>, Ashis Saha<sup>6</sup>, Markus Scholz<sup>24</sup>, Katharina Schramm<sup>31,32</sup>, Ilkka Seppälä<sup>28,29</sup>, Eline P. Slagboom<sup>4</sup>, Coen D.A. Stehouwer<sup>44</sup>, Michael Stumvoll<sup>45</sup>, Patrick Sullivan<sup>46</sup>, Peter-Bram 't Hoen<sup>47</sup>, Alexander Teumer<sup>48</sup>, Joachim Thiery<sup>49</sup>, Lin Tong<sup>2</sup>, Anke Tönjes<sup>45</sup>, Jenny van Dongen<sup>11</sup>, Maarten van Iterson<sup>4</sup>, Joyce van Meurs<sup>50</sup>, Jan H. Veldink<sup>51</sup>, Joost Verlouw<sup>50</sup>, Peter M. Visscher<sup>30</sup>, Uwe Völker<sup>52</sup>, Urmo Võsa<sup>8,14</sup>, Harm-Jan Westra<sup>8</sup>, Cisca Wijmenga<sup>8</sup>, Hanieh Yaghootkar<sup>15</sup>, Jian Yang<sup>30,53</sup>, Biao Zeng<sup>17</sup>, Futao Zhang<sup>30</sup>

Author list is ordered alphabetically.

1. Computational Biology, Ontario Institute for Cancer Research, Toronto, Canada
2. Department of Public Health Sciences, University of Chicago, Chicago, United States of America
3. Singapore Immunology Network, Agency for Science, Technology and Research, Singapore, Singapore
4. Department of Biomedical Data Sciences, Leiden University Medical Center, Leiden, The Netherlands
5. Department of Biomedical Engineering, Johns Hopkins University, Baltimore, United States of America
6. Department of Computer Science, Johns Hopkins University, Baltimore, United States of America
7. Heart Center Leipzig, Universität Leipzig, Leipzig, Germany
8. Department of Genetics, University Medical Centre Groningen, Groningen, The Netherlands
9. European Molecular Biology Laboratory, European Bioinformatics Institute, Wellcome Genome Campus, Hinxton, United Kingdom
10. Genome Biology Unit, European Molecular Biology Laboratory, Heidelberg, Germany
11. Department of Biological Psychology, Vrije Universiteit Amsterdam, Amsterdam, The Netherlands
12. Cardiovascular Health Research Unit, University of Washington, Seattle, United States of America
13. Genomics Coordination Center, University Medical Centre Groningen, Groningen, The Netherlands
14. Estonian Genome Center, Institute of Genomics, University of Tartu, Tartu 51010, Estonia
15. Exeter Medical School, University of Exeter, Exeter, United Kingdom
16. Department of Medicine, University of Washington, Seattle, United States of America
17. School of Biological Sciences, Georgia Tech, Atlanta, United States of America
18. MRC Integrative Epidemiology Unit, University of Bristol, Bristol, United Kingdom
19. Department of Psychiatry and Amsterdam Neuroscience, Amsterdam UMC, Vrije Universiteit, Amsterdam, the Netherlands
20. Department of Clinical Physiology, Tampere University, Tampere, Finland



21. Department of Clinical Physiology, Finnish Cardiovascular Research Center – Tampere, Faculty of Medicine and Life Sciences, University of Tampere, Tampere, Finland
22. Centre for Life Course Health Research, University of Oulu, Oulu, Finland
23. Genetics and Genomic Science Department, Icahn School of Medicine at Mount Sinai, New York, United States of America
24. Institut für Medizinische Informatik, Statistik und Epidemiologie, LIFE – Leipzig Research Center for Civilization Diseases, Universität Leipzig, Leipzig, Germany
25. IFB Adiposity Diseases, Universität Leipzig, Leipzig, Germany
26. Interdisciplinary Center for Clinical Research, Faculty of Medicine, Universität Leipzig, Leipzig, Germany
27. Institute of Social and Preventive Medicine, Lausanne University Hospital, Lausanne, Switzerland
28. Department of Clinical Chemistry, Fimlab Laboratories, Tampere, Finland
29. Department of Clinical Chemistry, Finnish Cardiovascular Research Center - Tampere, Faculty of Medicine and Life Sciences, University of Tampere, Tampere, Finland
30. Institute for Molecular Bioscience, University of Queensland, Brisbane, Australia
31. Institute of Genetic Epidemiology, Helmholtz Zentrum München - German Research Center for Environmental Health, Neuherberg, Germany
32. Department of Medicine I, University Hospital Munich, Ludwig Maximilian's University, München, Germany
33. DZHK (German Centre for Cardiovascular Research), partner site Munich Heart Alliance, Munich, Germany
34. Institute of Clinical Chemistry and Laboratory Medicine, University Medicine Greifswald, Greifswald, Germany
35. National Institute for Health and Welfare, University of Helsinki, Helsinki, Finland
36. Garvan Institute of Medical Research, Garvan-Weizmann Centre for Cellular Genomics, Sydney, Australia
37. Institute of Human Genetics, Helmholtz Zentrum München, Neuherberg, Germany
38. Institute of Human Genetics, Technical University Munich, Munich, Germany
39. Departments of Epidemiology, Medicine, and Health Services, University of Washington, Seattle, United States of America
40. Kaiser Permanente Washington Health Research Institute, Seattle, WA, United States of America
41. Department of Clinical Physiology and Nuclear Medicine, Turku University Hospital, Turku, Finland
42. Research Centre of Applied and Preventive Cardiovascular Medicine, University of Turku, Turku, Finland
43. Statistical and Translational Genetics, University of Helsinki, Helsinki, Finland
44. Department of Internal Medicine, Maastricht University Medical Centre, Maastricht, The Netherlands
45. Department of Medicine, Universität Leipzig, Leipzig, Germany
46. Department of Medical Epidemiology and Biostatistics, Karolinska Institutet, Stockholm, Sweden
47. Center for Molecular and Biomolecular Informatics, Radboud Institute for Molecular Life Sciences, Radboud University Medical Center Nijmegen, Nijmegen, The Netherlands
48. Institute for Community Medicine, University Medicine Greifswald, Greifswald, Germany
49. Institute for Laboratory Medicine, LIFE – Leipzig Research Center for Civilization Diseases, Universität Leipzig, Leipzig, Germany
50. Department of Internal Medicine, Erasmus Medical Centre, Rotterdam, The Netherlands
51. Department of Neurology, University Medical Center Utrecht, Utrecht, The Netherlands

52. Interfaculty Institute for Genetics and Functional Genomics, University Medicine Greifswald, Greifswald, Germany
53. Institute for Advanced Research, Wenzhou Medical University, Wenzhou, Zhejiang 325027, China

## **The Biobank Japan Project**

Koichi Matsuda. Laboratory of Genome Technology, Human Genome Center, Institute of Medical Science, The University of Tokyo, Tokyo, Japan. Laboratory of Clinical Genome Sequencing, Graduate School of Frontier Sciences, The University of Tokyo, Tokyo, Japan.

[kmatsuda@edu.k.u-tokyo.ac.jp](mailto:kmatsuda@edu.k.u-tokyo.ac.jp)

Yuji Yamanashi. Division of Genetics, The Institute of Medical Science, The University of Tokyo, Tokyo, Japan. [yyamanas@ims.u-tokyo.ac.jp](mailto:yyamanas@ims.u-tokyo.ac.jp)

Yoichi Furukawa. Division of Clinical Genome Research, Institute of Medical Science, The University of Tokyo, Tokyo, Japan. [furukawa@ims.u-tokyo.ac.jp](mailto:furukawa@ims.u-tokyo.ac.jp)

Takayuki Morisaki. Division of Molecular Pathology IMSUT Hospital, Department of Internal Medicine Project Division of Genomic Medicine and Disease Prevention The Institute of Medical Science The University of Tokyo, Tokyo, Japan. [morisaki@ims.u-tokyo.ac.jp](mailto:morisaki@ims.u-tokyo.ac.jp)

Yoshinori Murakami. Department of Cancer Biology, Institute of Medical Science, The University of Tokyo, Tokyo, Japan. [ymurakam@ims.u-tokyo.ac.jp](mailto:ymurakam@ims.u-tokyo.ac.jp)

Yoichiro Kamatani. Laboratory of Complex Trait Genomics, Graduate School of Frontier Sciences, The University of Tokyo, Tokyo, Japan.

Laboratory of Clinical Genome Sequencing, Graduate School of Frontier Sciences, The University of Tokyo, Tokyo, Japan. [kamatani.yoichiro@edu.k.u-tokyo.ac.jp](mailto:kamatani.yoichiro@edu.k.u-tokyo.ac.jp)

Kaori Muto. Department of Public Policy, Institute of Medical Science, The University of Tokyo, Tokyo, Japan. [krmt@ims.u-tokyo.ac.jp](mailto:krmt@ims.u-tokyo.ac.jp)

Akiko Nagai. Department of Public Policy, Institute of Medical Science, The University of Tokyo, Tokyo, Japan. [akikongi@ims.u-tokyo.ac.jp](mailto:akikongi@ims.u-tokyo.ac.jp)

Wataru Obara. Department of Urology, Iwate Medical University, Iwate, Japan. [watao@iwate-med.ac.jp](mailto:watao@iwate-med.ac.jp)

Ken Yamaji. Department of Internal Medicine and Rheumatology, Juntendo University Graduate School of Medicine, Tokyo, Japan. [k.yamaji@juntendo.ac.jp](mailto:k.yamaji@juntendo.ac.jp)

Kazuhisa Takahashi. Department of Respiratory Medicine, Juntendo University Graduate School of Medicine, Tokyo, Japan. [kztakaha@juntendo.ac.jp](mailto:kztakaha@juntendo.ac.jp)

Satoshi Asai. Division of Pharmacology, Department of Biomedical Science, Nihon University School of Medicine, Tokyo, Japan.

Division of Genomic Epidemiology and Clinical Trials, Clinical Trials Research Center, Nihon University. School of Medicine, Tokyo, Japan. [asai.satoshi@nihon-u.ac.jp](mailto:asai.satoshi@nihon-u.ac.jp)

Yasuo Takahashi. Division of Genomic Epidemiology and Clinical Trials, Clinical Trials Research Center, Nihon University School of Medicine, Tokyo, Japan. [takahashi.yasuo@nihon-u.ac.jp](mailto:takahashi.yasuo@nihon-u.ac.jp)

Takao Suzuki. Tokushukai Group, Tokyo, Japan. [takao.suzuki@tokushukai.jp](mailto:takao.suzuki@tokushukai.jp)

Nobuaki Sinozaki. Tokushukai Group, Tokyo, Japan. [nobuaki.shinozaki@tokushukai.jp](mailto:nobuaki.shinozaki@tokushukai.jp)

Hiroki Yamaguchi. Department of Hematology, Nippon Medical School, Tokyo, Japan. [y-hiroki@fd6.so-net.ne.jp](mailto:y-hiroki@fd6.so-net.ne.jp)

Shiro Minami. Department of Bioregulation, Nippon Medical School, Kawasaki, Japan.

[shirom@nms.ac.jp](mailto:shirom@nms.ac.jp)

Shigeo Murayama. Tokyo Metropolitan Geriatric Hospital and Institute of Gerontology, Tokyo, Japan.

[smurayam@bbarjp.net](mailto:smurayam@bbarjp.net)

Kozo Yoshimori. Fukujuji Hospital, Japan Anti-Tuberculosis Association, Tokyo, Japan.

[yoshimorik@fukujuji.org](mailto:yoshimorik@fukujuji.org)

Satoshi Nagayama. The Cancer Institute Hospital of the Japanese Foundation for Cancer Research, Tokyo, Japan. [snagayama2009@hotmail.co.jp](mailto:snagayama2009@hotmail.co.jp)

Daisuke Obata. Center for Clinical Research and Advanced Medicine, Shiga University of Medical Science, Shiga, Japan. [dobata@belle.shiga-med.ac.jp](mailto:dobata@belle.shiga-med.ac.jp)

Masahiko Higashiyama. Department of General Thoracic Surgery, Osaka International Cancer Institute, Osaka, Japan. [higashiyama-m@higashiosaka-hosp.jp](mailto:higashiyama-m@higashiosaka-hosp.jp)

Akihide Masumoto. IIZUKA HOSPITAL, Fukuoka, Japan. [amasumotoh1@aih-net.com](mailto:amasumotoh1@aih-net.com)

Yukihiro Koretsune. National Hospital Organization Osaka National Hospital, Osaka, Japan.

[koretune318@hotmail.co.jp](mailto:koretune318@hotmail.co.jp)

## **China Kadoorie Biobank Collaborative Group**

**International Steering Committee:** Junshi Chen, Zhengming Chen (PI), Robert Clarke, Rory Collins, Yu Guo, Liming Li (PI), Chen Wang, Jun Lv, Richard Peto, Robin Walters.

**International Co-ordinating Centre, Oxford:** Daniel Avery, Ruth Boxall, Derrick Bennett, Ka Hung Chan, Yumei Chang, Yiping Chen, Zhengming Chen, Robert Clarke, Huaidong Du, Zамmy Fairhurst-Hunter, Wei Gan, Simon Gilbert, Alex Hacker, Parisa Hariri, Mike Hill, Michael Holmes, Pek Kei Im, Andri Iona, Maria Kakkoura, Christiana Kartsonaki, Rene Kerosi, Kuang Lin, Iona Millwood, Qunhua Nie, Alfred Pozarickij, Paul Ryder, Sam Sansome, Dan Schmidt, Paul Sherliker, Rajani Sohoni, Becky Stevens, Iain Turnbull, Robin Walters, Lin Wang, Neil Wright, Ling Yang, Xiaoming Yang, Pang Yao.

**National Co-ordinating Centre, Beijing:** Yu Guo, Xiao Han, Can Hou, Chun Li, Chao Liu, Jun Lv, Pei Pei, Canqing Yu.

### **10 Regional Co-ordinating Centres:**

**Guangxi** Provincial CDC: Naying Chen, Duo Liu, Zhenzhu Tang. **Liuzhou** CDC: Ningyu Chen, Qilian Jiang, Jian Lan, Mingqiang Li, Yun Liu, Fanwen Meng, Jinhuai Meng, Rong Pan, Yulu Qin, Ping Wang, Sisi Wang, Liuping Wei, Liyuan Zhou. **Gansu** Provincial CDC: Caixia Dong, Pengfei Ge, Xiaolan Ren. **Maiji** CDC: Zhongxiao Li, Enke Mao, Tao Wang, Hui Zhang, Xi Zhang. **Hainan** Provincial CDC: Jinyan Chen, Ximin Hu, Xiaohuan Wang. **Meilan** CDC: Zhendong Guo, Huimei Li, Yilei Li, Min Weng, Shukuan Wu. **Heilongjiang** Provincial CDC: Shichun Yan, Mingyuan Zou, Xue Zhou. **Nangang** CDC: Ziyang Guo, Quan Kang, Yanjie Li, Bo Yu, Qinai Xu. **Henan** Provincial CDC: Liang Chang, Lei Fan, Shixian Feng, Ding Zhang, Gang Zhou. **Huixian** CDC: Yulian Gao, Tianyou He, Pan He, Chen Hu, Huarong Sun, Xukui Zhang. **Hunan** Provincial CDC: Biyun Chen, Zhongxi Fu, Yuelong Huang, Huilin Liu, Qiaohua Xu, Li Yin. **Liuyang** CDC: Huajun Long, Xin Xu, Hao Zhang, Libo Zhang. **Jiangsu** Provincial CDC: Jian Su, Ran Tao, Ming Wu, Jie Yang, Jinyi Zhou, Yonglin Zhou. **Suzhou** CDC: Yihe Hu, Yujie Hua, Jianrong Jin Fang Liu, Jingchao Liu, Yan Lu, Liangcai Ma, Aiyu Tang, Jun Zhang. **Qingdao** Qingdao CDC: Liang Cheng, Ranran Du, Ruqin Gao, Feifei Li, Shanpeng Li, Yongmei Liu, Feng Ning, Zengchang Pang, Xiaohui Sun, Xiaocao Tian, Shaojie Wang, Yaoming Zhai, Hua Zhang, Licang CDC: Wei Hou, Silu Lv, Junzheng Wang. **Sichuan** Provincial CDC: Xiaofang Chen, Xianping Wu, Ningmei Zhang, Weiwei Zhou. **Pengzhou** CDC: Xiaofang Chen, Jianguo Li, Jiaqiu Liu, Guojin Luo, Qiang Sun, Xunfu Zhong. **Zhejiang** Provincial CDC: Weiwei Gong, Ruying Hu, Hao Wang, Meng Wan, Min Yu. **Tongxiang** CDC: Lingli Chen, Qijun Gu, Dongxia Pan, Chunmei Wang, Kaixu Xie, Xiaoyi Zhang.

## **kConFab**

David Amor, Medical Geneticist, Genetic Health Services, Victoria Royal Children's Hospital, Melbourne VIC 3050

Lesley Andrews, Hereditary Cancer Clinic, Prince of Wales Hospital Randwick, NSW 2031

Yoland Antill, Dept. Haem and Medical Oncology, Peter MacCallum Cancer Centre, St Andrews Place, East Melbourne VIC 3002

Rosemary Balleine, Department of Translational Oncology, C/- Department of Medical Oncology, Westmead Hospital, Westmead NSW 2145

Jonathan Beesley, Research Officer, Queensland Institute of Medical Research, Herston Road Herston, Qld 4002 Australia

Ian Bennett, Silverton Place, 101 Wickham, Terrace Brisbane QLD 4000

Michael Bogwitz, Familial Cancer Centre, The Royal Melbourne Hospital, Grattan Street Parkville, Victoria 3050 Australia

Leon Botes, Clinical Nurse Specialist, Hereditary Cancer Centre, Prince of Wales Hospital, Barker St, Randwick, NSW 2031 Australia

Meagan Brennan, NSW Breast Cancer Institute, PO Box 143, Westmead NSW 2145

Melissa Brown, Department of Biochemistry, University of Queensland, St. Lucia QLD 4072

Michael Buckley, Molecular and Cytogenetics Unit, Prince of Wales Hospital, Randwick NSW 2031

Jo Burke, Royal Hobart Hospital, GPO Box 1061L Hobart TAS 7001

Phyllis Butow, Medical Psychology Unit, Royal Prince Alfred Hospital, Camperdown NSW 2204

Liz Caldon, Replication and Genome Stability Cancer Division, Garvan Institute of Medical Research, 370 Victoria Street, Darlinghurst NSW 2010, Australia

Ian Campbell, Peter MacCallum Cancer Centre, St Andrew's Place, East Melbourne VIC 3002

Deepa Chauhan, School of Psychology, Brennan McCallum (Building A18), University of Sydney 2006

Manisha Chauhan, St Vincents Hospital Cancer Genetics Clinic, The Kinghorn Cancer Centre Sydney NSW

Georgia Chenevix-Trench, Queensland Institute of Medical Research, Royal Brisbane Hospital, Herston QLD 4029

Alice Christian, Genetics Department, Central Region Genetics Service, Wellington Hospital, New Zealand

Paul Cohen, Director of Gynaecological Cancer Research, St John of God Subiaco Hospital, 12 Salvado Road Subiaco WA 6008, Australia

Alison Colley, Department of Clinical Genetics, Liverpool Health Service, PO Box 103, Liverpool NSW 2170

Ashley Crook, Department of Clinical Genetics, Level 3E, Royal North Shore Hospital, St Leonards NSW 2065

James Cui, Epidemiology and Preventive Medicine, Monash University, Prahan Vic 3004, Australia

Margaret Cummings, Department of Pathology, University of Queensland Medical School, Herston NSW 4006

Sarah-Jane Dawson, Molecular Genetics Department, Cambridge University, England

Anna deFazio, Dept. Gynaecological Oncology, Westmead Institute for Cancer Research, Westmead Hospital Westmead NSW 2145

Martin Delatycki, Director, Clinical Genetics, Austin Health, Heidelberg Repatriation Hospital, PO Box 5444, Heidelberg West Vic 3081, Australia

Rebecca Dickson, Associate Genetic Counsellor, Level 2, Block 51 Royal North Shore Hospital, North Shore NSW 2408

Joanne Dixon, Central Regional Genetic Services, Wellington Hospital Private bag 7902, Wellington, New Zealand

Ted Edkins, Clinical Chemistry, Princess Margret Hospital for Children, Box D184, Perth WA 6001

Stacey Edwards, Department of Biochemistry and Molecular Biology, University of Queensland, St Lucia Qld 4072, Australia

Gelareh Farshid, Tissue Pathology, IMVS, Adelaide SA 5000

Andrew Fellows, Molecular Diagnostic Development, Pathology Department, Peter MacCallum Cancer Centre, Melbourne East Melbourne Vic 3002

Georgina Fenton, South West Family Cancer Clinic, Liverpool Hospital Liverpool, BC NSW 1871

Michael Field, Clinical Geneticist, Royal North Shore Hospital, Level 2, Vindin House, St Leonards NSW 2065

James Flanagan, Epigenetics Unit, Department of Surgery and Oncology, Imperial College London, London W12 0NN, England

Peter Fong, Medical Oncology Department, Regional Cancer and Blood, Services, Level 1 Building 7, Auckland City Hospital, 2 Park Rd. Grafton, Auckland 1023, New Zealand

Laura Forrest, Psychosocial Cancer Genetics Research Group, Parkville Familial Cancer Centre, 305 Grattan Street, Melbourne Vic 3000, Australia

Stephen Fox, Pathology Department, Level 1, Peter MacCallum Cancer Centre, St Andrew's Place, East Melbourne Vic 3002

Juliet French, School of Molecular and Microbial Sciences, University of Queensland, St Lucia Qld 4072

Michael Friedlander, Professor of Medicine, Department of Medical Oncology, Prince of Wales Hospital, Randwick NSW 2031

Clara Gaff, Victorian Clinical Genetics Service, Royal Melbourne Hospital, Parkville VIC 3052

Mike Gattas, Queensland Clinical Genetic Service, Royal Children's Hospital, Bramston Terrace, Herston QLD 4020

Peter George, Clinical Biochemistry Unit, Canterbury Health Labs, PO Box 151, Christchurch, New Zealand

Sian Greening, Illawarra Cancer Centre, Wollongong Hospital, Private Mail Bag 8808, South Coast Mail Centre, NSW 2521

Marion Harris, Familial Cancer Clinic, Peter MacCallum Cancer Centre, St Andrews Place East Melbourne VIC 3002

Stewart Hart, Breast and Ovarian Cancer Genetics, Monash Medical Centre, 871 Centre Road, Bentleigh East VIC 3165

Nick Hayward, Queensland Institute for Medical Research, Royal Brisbane Hospital, Post Office, Herston QLD 4029

John Hopper, Centre for M.E.G.A. Epidemiology, University of Melbourne, Level 1, 723 Swanston Street, Carlton VIC 3010

Cass Hoskins, Parkville Familial Cancer Centre, Peter MacCallum Cancer Centre & The Royal Melbourne Hospital, Melbourne, 3000

Clare Hunt, Southern Health Familial Cancer Centre, Monash Medical Centre, Special Medicine Building, 246, Clayton Rd Clayton Victoria 3168, Australia

Paul James, Clinical Geneticist, Genetic Health Services, Monash Medical Centre, Clayton Vic

Mark Jenkins, Centre for M.E.G.A. Epidemiology, The University of Melbourne, 723 Swanston Street, Carlton VIC 3053

Alexa Kidd, Clinical Genetics Departments, Central Regional Genetics Service, Wellington Hospital, New Zealand

Judy Kirk, Familial Cancer Service, Department of Medicine, Westmead Hospital, Westmead NSW 2145

Jessica Koehler, Hereditary Cancer Clinic, Prince of Wales Hospital, Randwick NSW 2031

James Kollias, Breast Endocrine and Surgical Unit, Royal Adelaide Hospital, North Terrace SA 5000

Sunil Lakhani, UQ Centre for Clinical Research, Level 6 Building 71/918, University of Queensland The Royal Brisbane & Women's Hospital Herston, 4029

Mitchell Lawrence, Prostate Cancer Research Program, 19 Innovation Walk, Level 3, Monash University, Clayton, 3800

Geoff Lindeman, Breast Cancer Laboratory, Walter and Eliza Hall Institute, PO Royal Melbourne Hospital, Parkville VIC 3050

Lara Lipton, Medical Oncology and Clinical Haematology Unit, Western Hospital, Footscray VIC

Liz Lobb, Medical Psychology Research Unit, Room 332, Brennan MacCallum Building (A18), The University of Sydney, Camperdown, 2006

Graham Mann, Westmead Institute for Cancer Research, Westmead Millennium Institute, Westmead NSW 2145

Deborah Marsh, Kolling Institute of Medical Research, Royal North Shore Hospital, St Leonards NSW 2065

Sue Anne McLachlan, Department of Oncology, St Vincent's Hospital, 41 Victoria Parade, Fitzroy VIC 3065

Bettina Meiser, Hereditary Cancer Clinic, Prince of Wales Hospital, Randwick NSW 2031

Roger Milne, Centro Nacional de Investigaciones Oncológicas, C/ Melchor Fernández Almagro, 3, E-28029 Madrid, Spain

Sophie Nightingale, Western Health and Peter MacCallum Cancer Centre, Consultant, General, Breast and Melanoma Surgeon, St Andrew's Place, East Melbourne Victoria 3002

Shona O'Connell, Southern Health Familial Cancer Centre, Special Medicine Building, 246 Clayton Road, Clayton Vic 3168

Sarah O'Sullivan, Genetic Services of Western, Level 3 Agnes Walsh House, 374 Bagot Road, Subiaco WA 6008, Australia

David Gallego Ortega, Tumour Development Group, Garvan Institute of Medical Research, The Kinghorn Cancer Centre, 370 Victoria St, Darlinghurst NSW 2010, Australia



Nick Pachter, Familial Cancer and Clinical Genetics, Royal Melbourne Hospital, Grattan Street, Parkville VIC 3050, Australia

Briony Patterson, Tas Clinical Genetics Service, Royal Hobart Hospital, GPO Box 1061, Hobart Tasmania 7001, Australia

Amy Pearn, The Gene Council, Perth, Australia, PO Box 510, North Perth WA 6906, Australia

Kelly Phillips, Department of Medical Oncology, Peter MacCallum Cancer Centre, St Andrew's Place, East Melbourne VIC 3002

Ellen Pieper, Associate Genetic Counsellor, Parkville Familial Cancer Centre and Genomic Medicine, VCCC Grattan Street, Melbourne Vic 3000, Australia

Edwina Rickard, Familial Cancer centre, Westmead Hospital, Westmead NSW 2145

Bridget Robinson, Oncology Service, Christchurch Hospital Private Bag 4710, Christchurch, New Zealand

Mona Saleh, Centre for Genetic Education, Prince of Wales Hospital, Randwick NSW 2031

Elizabeth Salisbury, Anatomical Pathology, Conjoint Associate Professor, UNSW, Prince of Wales Hospital Randwick, 2031 NSW

Christobel Saunders, School of Surgery and Pathology, QE11 Medical Centre, M block 2nd Floor, Nedlands WA 6907

Jodi Saunus, Breast Pathology, University of Queensland Centre for Clinical Research, Building 71/918 Royal Brisbane and Women's Hospital, Herston Qld 4029

Rodney Scott, Hunter Area Pathology Service, John Hunter Hospital, Locked Bag 1 Regional Mail Centre, NSW 2310

Clare Scott, Research Department, WEHI C/o, Royal Melbourne Hospital, Parkville, 3050

Adrienne Sexton, Familial Cancer Centre, Royal Melbourne Hospital, Grattan Street, Parkville Vic 3050

Andrew Shelling, Obstetrics and Gynaecology, University of Auckland, New Zealand

Peter Simpson, The University of Queensland, Building 71/918, RBWH Campus, Herston Qld 4029

Melissa Southey, Genetic Epidemiology Laboratory, Departemnt of Pathology, University of Melbourne, VIC 3010

Amanda Spurdle, Cancer Unit, Queensland Institute of Medical Research, Herston QLD 4029

Jessica Taylor, Familial Cancer and Genetics Medicine, Royal Melbourne Hospital, 2nd Floor Grattan Street, Parkville Vic 3050 Australia

Renea Taylor, Deputy Head, Cancer Program. Monash University, Rm 349, Level 3, Building 76, 19 Innovation Walk, Clayton VIC 3800

Heather Thorne, Research Department, Peter MacCallum Cancer Centre, St Andrew's Place, East Melbourne VIC 3002

Alison Trainer, University of NSW, Prince of Wales Hospital, Barker Street, Randwick NSW 2031

Kathy Tucker, Heredity Cancer Clinic, Prince of Wales Hospital, Randwick NSW 2031

Jane Visvader, The Walter and Eliza Hall Institute of Medical Research, Post Office Royal Melbourne Hospital, Parkville VIC 3050

Logan Walker, Molecular Cancer Epidemiology Laboratory, Queensland Institute of Medical Research, P.O. Royal Brisbane Hospital, Herston Qld 4027, Australia

Rachael Williams, Family Cancer Clinic, St Vincent's Hospital, Darlinghurst NSW 2010

Ingrid Winship, Department of Genetics, Royal Melbourne Hospital, Parkville, 3050

Mary Ann Young, Genome.One, 370 Victoria St Darlinghurst, 2010 NSW

## **The LifeLines Cohort Study**

Behrooz Z. Alizadeh<sup>1</sup>, H. Marike Boezen<sup>1</sup>, Lude Franke<sup>2</sup>, Pim van der Harst<sup>3</sup>, Gerjan Navis<sup>4</sup>, Marianne Rots<sup>5</sup>, Harold Snieder<sup>1</sup>, Morris Swertz<sup>2</sup>, Bruce H. R. Wolffenbuttel<sup>6</sup> & Cisca Wijmenga<sup>2</sup>

<sup>1</sup>Department of Epidemiology, University of Groningen, University Medical Center Groningen, Groningen, The Netherlands.

<sup>2</sup>Department of Genetics, University of Groningen, University Medical Center Groningen, Groningen, The Netherlands.

<sup>3</sup>Department of Cardiology, University of Groningen, University Medical Center Groningen, Groningen, The Netherlands.

<sup>4</sup>Division of Nephrology, Department of Internal Medicine, University of Groningen, University Medical Center Groningen, Groningen, The Netherlands.

<sup>5</sup>Department of Pathology and Medical Biology, University of Groningen, University Medical Center Groningen, Groningen, The Netherlands.

<sup>6</sup>Department of Endocrinology, University of Groningen, University Medical Center Groningen, Groningen, The Netherlands.

## The InterAct consortium

Claudia Langenberg(1), Robert A Scott(1), Stephen J Sharp(1), Nita G Forouhi(1), Nicola D Kerrison(1), Matt Sims(1), Debora ME Lucarelli(1), Inês Barroso(1,2), Panos Deloukas(3), Mark I McCarthy(4,5,6), Antonio Agudo(7), Beverley Balkau(8), Aurelio Barricarte(9,10,11), Heiner Boeing(12), Miren Dorransoro(13,14,11), Paul W Franks(15,16), Sara Grioni(17), Rudolf Kaaks(18), Timothy J Key(19), Carmen Navarro(20,11,21), Peter M Nilsson(22), Kim Overvad(23,24), Domenico Palli(25), Salvatore Panico(26), J. Ramón Quirós(27), Olov Rolandsson(28), Carlotta Sacerdote(29), María-José Sánchez(30,11,31), Nadia Slimani(32), Annemieke MW Spijkerman(33), Anne Tjonneland(34), Rosario Tumino(35,36), Yvonne T van der Schouw(37), Elio Riboli(38), Nicholas J Wareham(1)

Affiliations (de-duplicated by ID Number):

(1) MRC Epidemiology Unit, University of Cambridge School of Clinical Medicine, Box 285 Institute of Metabolic Science, Cambridge Biomedical Campus Cambridge, CB2 0QQ, United Kingdom, (2) University of Cambridge Metabolic Research Laboratories, Institute of Metabolic Science Addenbrooke's Hospital CB2 0QQ Cambridge, (3) Department of Human Genetics, Wellcome Trust Sanger Institute, Wellcome Trust Genome Campus, Hinxton, Cambridge, CB10 1SA, United Kingdom, (4) Oxford Centre for Diabetes, Endocrinology and Metabolism (OCDEM), University of Oxford, Churchill Hospital, Old Road, Headington, Oxford, OX3 7LJ, UK, (5) Wellcome Trust Centre for Human Genetics, University of Oxford, Roosevelt Drive, Oxford, OX3 7BN, UK, (6) Oxford NIHR Biomedical Research Centre, Churchill Hospital, Old Road, Headington, Oxford, OX3 7LJ, UK, (7) Unit of Nutrition, Environment and Cancer, Cancer Epidemiology Research Program, Catalan Institute of Oncology, 08908 Barcelona, Spain, (8) CESP, University Paris-South, Faculty of Medicine, University Versailles-St Quentin, Inserm U1018, University Paris-Saclay, 94800 Villejuif, France, (9) Navarre Public Health Institute, Leyre 15, 31003 Pamplona, Navarra, Spain, (10) Navarre Institute for Health Research (IdiSNA) Pamplona, Spain, (11) Consortium for Biomedical Research in Epidemiology and Public Health (CIBER Epidemiología y Salud Pública), Av. Monforte de Lemos, 3-5. Pabellón 11. Planta 0 28029 Madrid, Spain, (12) Department of Epidemiology, German Institute of Human Nutrition Potsdam-Rehbruecke, Arthur-Scheunert-Allee 114-116, 14558 Nuthetal, Germany, (13) Public Health Division of Gipuzkoa, Basque Government, Av. Navarra 4, 20013 San Sebastian, Spain, (14) Instituto BIO-Donostia, Basque Government, San Sebastian, Spain, (15) Department of Clinical Sciences, Clinical Research Center, Skåne University Hospital, Lund University, 20502 Malmö, Sweden, (16) Department of Public Health and Clinical Medicine, Umeå University, 90187 Umeå, Sweden, (17) Fondazione IRCCS Istituto Nazionale dei Tumori Milan, Via Venezian, 1, 20133 Milan, Italy, (18) Division of Cancer Epidemiology, German Cancer Research Center (DKFZ), Im Neuenheimer Feld 581, 69120 Heidelberg, Germany, (19) Cancer Epidemiology Unit, Nuffield Department of Population Health, University of Oxford, Oxford, United Kingdom, (20) Department of Epidemiology, Murcia Regional Health Council, IMIB-Arrixaca, Ronda de Levante, 11, 30008, Murcia, Spain, (21) Unit of Preventive Medicine and Public Health, School of Medicine, University of Murcia, Spain, (22) Department of Clinical Sciences, Clinical Research Center, Skåne University Hospital, Lund University, 20502 Malmö, Sweden, (23) Department of Public Health, Aarhus University, Bartholins Allé 2, DK-8000 Aarhus C, Denmark, (24) Department of Cardiology, Aalborg University Hospital, Sdr. Skovvej 15, DK-9000 Aalborg, Denmark, (25) Cancer Risk Factors and Life-Style Epidemiology Unit, Cancer Research and Prevention Institute – ISPO, Florence, Italy, (26) Dipartimento di Medicina Clinica e Chirurgia, Federico II University, via Pansini 5-80131 Naples, Italy, (27) Consejería de Sanidad, Public Health Directorate, C/Ciriaco Miguel Vigil 9, 33006- Oviedo-Asturias, Spain, (28) Department of Public Health and Clinical Medicine, Family Medicine, Umeå University 90187 Umeå, Sweden, (29) Unit of Cancer Epidemiology, AO Citta' della Salute e della Scienza Hospital-University of Turin and

Center for Cancer Prevention (CPO), Via Santena 7, 10126 Torino, Italy, (30) Andalusian School of Public Health, Cuesta del Observatorio 4, CP 18080 Granada, Spain, (31) Instituto de Investigación Biosanitaria de Granada (ibs.GRANADA), Universidad de Granada, Granada, Spain, (32) International Agency for Research on Cancer, Dietary Exposure Assessment Group (DEX), 150 Cours Albert Thomas, 69372 Lyon Cedex 08, France, (33) National Institute for Public Health and the Environment (RIVM), PO Box 1, 3720 BA Bilthoven, The Netherlands, (34) Danish Cancer Society Research Center, Strandboulevarden 49, 2100 Copenhagen, Denmark, (35) Cancer Registry and Histopathology Department, Azienda Sanitaria Provinciale No 7, Piazza Igea Nr 1, 97100 Ragusa, Italy, (36) Associazione Iblea per la Ricerca Epidemiologica -Organizzazione Non Lucrativa di Utilità Sociale, Piazza Amcione No 2, 97100 Ragusa, Italy, (37) Julius Center for Health Sciences and Primary Care, University Medical Center Utrecht, Utrecht University, 3584 CG Utrecht, the Netherlands, (38) School of Public Health, Imperial College London, Norfolk Place, London W2 1PG, UK

**23andMe Research Team**

Michelle Agee, Robert K Bell, Katarzyna Bryc, Sarah L Elson, David A Hinds, Karen E Huber, Aaron Kleinman, Nadia K Litterman, Jennifer C McCreight, Matthew H McIntyre, Joanna L Mountain, Elizabeth S Noblin, Carrie A M Northover, J Fah Sathirapongsasuti, Olga V Sazonova, Janie F Shelton, Suyash Shringarpure, Chao Tian, Joyce Y Tung, Vladimir Vacic

Affiliation: 23andMe Inc., 223N Mathilda Ave, Sunnyvale, CA, 94086, USA.
